# Supplementary material for: The Use of Comparative Genomic Analysis for the Development of Subspecies-Specific PCR Assays for Mycobacterium abscessus
Source: PubMed Central journal article supplement (PMC8995789; doi:10.3389/fcimb.2022.816615), 2022-03-28
Supplement: DataSheet_1.pdf [file DataSheet_1.pdf]

## Supplementary Figure S1

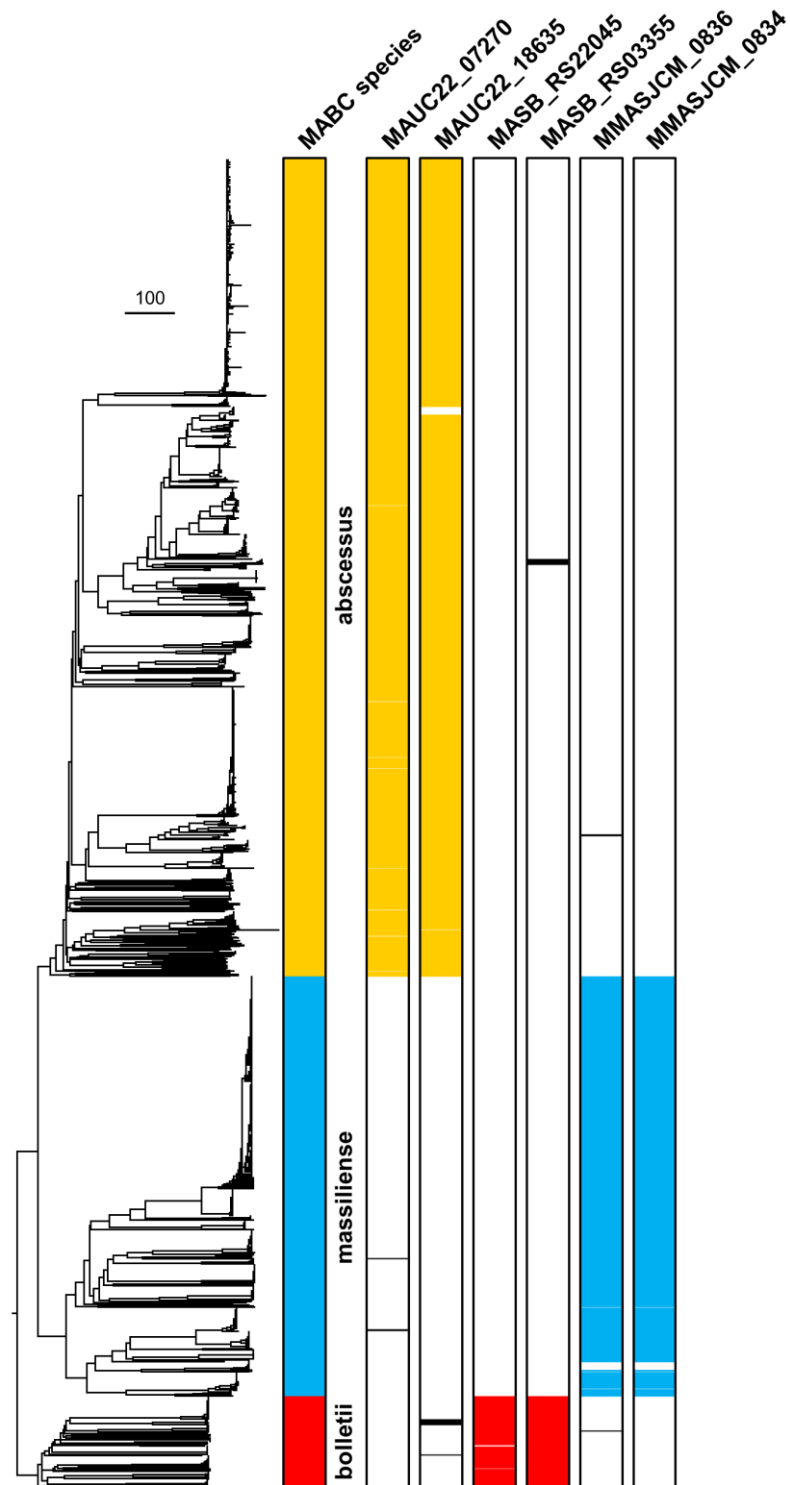

**Figure S1.** Phylogenetic tree of 1,663 genomes from the *Mycobacterium abscessus* complex (MABC), based on core genome MLST. The three clusters representing the subspecies *M. abscessus* subsp. *abscessus* (orange, abscessus), *M. abscessus* subsp. *bolletii* (red, bolletii) and *M. abscessus* subsp. *massiliense* (blue, massiliense) are indicated in the first bar. The other bars show the *in silico* PCR predictions with the MABC subspecies-specific PCRs (Tables 1 & 2). Orange, red and blue lines represent a match of the PCR with the relevant MABC subspecies, a black line represent a predicted PCR-positivity outside the associated MABC subspecies.

## Supplementary Figure S2

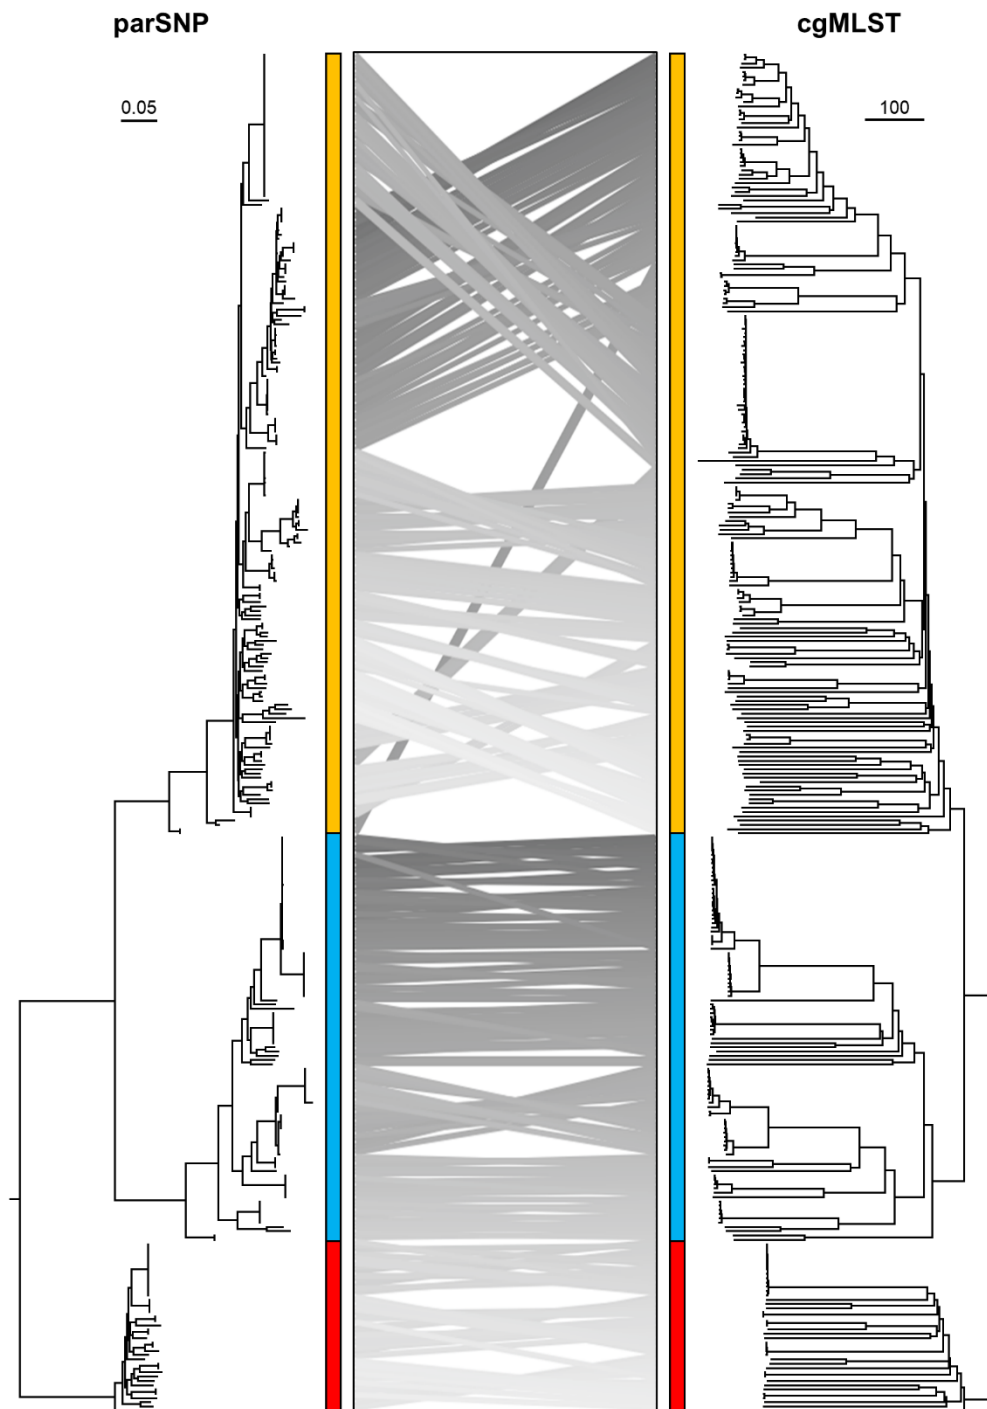

**Figure S2.** Tanglegram comparing phylogenetic trees derived from 318 genomes of the *Mycobacterium abscessus* complex (MABC), showing that clustering to identify the MABC subspecies is comparable between the two methods, but that within the MABC subspecies there are differences in clustering. The tree on the left is based on core genome single nucleotide polymorphisms, the tree on the right is based on core genome MLST. The three clusters representing the subspecies *M. abscessus* subsp. *abscessus* (orange), *M. abscessus* subsp. *bolletii* (red) and *M. abscessus* subsp. *massiliense* (blue) are indicated in the colour bars.

**Table S1.** Information of *Mycobacterium abscessus* Complex genomes used in this study, including their in silico PCR outcome with the 6 sets of PCR primers.

| SNP <sup>1</sup> | cgMLST <sup>1</sup> | Code <sup>2</sup> | Organism/Name Genbank <sup>3</sup> | Strain          | Assembly <sup>4</sup> | Source                    | MAUC22_07270 | MAUC22_18635 | MASB_RS22045 | MASB_RS03355 | MMASJCM_0836 | MMASJCM_0834 |
|------------------|---------------------|-------------------|------------------------------------|-----------------|-----------------------|---------------------------|--------------|--------------|--------------|--------------|--------------|--------------|
| 1                | 245                 | Mbaa0288          | M abscessus subsp abscessus        | 445             | GCA_900138775         | Respiratory system        | Positive     | Positive     | negative     | negative     | negative     | negative     |
| 2                | 262                 | Mbaa0783          | M abscessus subsp abscessus        | A189            | GCA_002802045         | lavage fluid              | Positive     | Positive     | negative     | negative     | negative     | negative     |
| 3                | 263                 | Mbaa0454          | M abscessus subsp abscessus        | 703             | GCA_900139255         | Respiratory system        | Positive     | Positive     | negative     | negative     | negative     | negative     |
| 4                | 272                 | Mbaa0830          | M abscessus subsp abscessus        | A59             | GCA_002802125         | sputum                    | Positive     | Positive     | negative     | negative     | negative     | negative     |
| 5                | 271                 | Mbaa0075          | M abscessus subsp abscessus        | 86              | GCA_002800775         | lavage fluid              | Positive     | Positive     | negative     | negative     | negative     | negative     |
| 6                | 277                 | Mbaa1343          | M abscessus                        | A213            | GCA_003071925         | sputum                    | Positive     | Positive     | negative     | negative     | negative     | negative     |
| 7                | 283                 | Mbaa0325          | M abscessus subsp abscessus        | 508             | GCA_900137925         | Respiratory system        | Positive     | Positive     | negative     | negative     | negative     | negative     |
| 8                | 294                 | Mbaa1661          | M abscessus                        | UC95            | GCA_001187745         | human-associated habitat  | Positive     | Positive     | negative     | negative     | negative     | negative     |
| 9                | 246                 | Mbaa0366          | M abscessus subsp abscessus        | 592             | GCA_900139825         | Respiratory system        | Positive     | Positive     | negative     | negative     | negative     | negative     |
| 10               | 207                 | Mbaa1337          | M abscessus                        | 6G-0212         | GCA_000270645         | sputum                    | Positive     | Positive     | negative     | negative     | negative     | negative     |
| 11               | 184                 | Mbaa1311          | M abscessus                        | 1948            | GCA_000523855         | sputum                    | Positive     | Positive     | negative     | negative     | negative     | negative     |
| 12               | 208                 | Mbaa1338          | M abscessus                        | 6G-0728-R       | GCA_000270605         | sputum                    | Positive     | Positive     | negative     | negative     | negative     | negative     |
| 13               | 209                 | Mbaa1340          | M abscessus                        | 6G-1108         | GCA_000271145         | sputum                    | Positive     | Positive     | negative     | negative     | negative     | negative     |
| 14               | 201                 | Mbaa0423          | M abscessus subsp abscessus        | 665             | GCA_900139195         | Respiratory system        | Positive     | Positive     | negative     | negative     | negative     | negative     |
| 15               | 187                 | Mbaa1497          | M abscessus                        | MAB_110811_2726 | GCA_000523935         | sputum                    | Positive     | Positive     | negative     | negative     | negative     | negative     |
| 16               | 185                 | Mbaa1310          | M abscessus                        | 1518            | GCA_000523895         | sputum                    | Positive     | Positive     | negative     | negative     | negative     | negative     |
| 17               | 60                  | Mbaa1359          | M abscessus                        | FLAC013         | GCA_001606295         | Homo sapiens              | Positive     | Positive     | negative     | negative     | negative     | negative     |
| 18               | 55                  | Mbaa0409          | M abscessus subsp abscessus        | 648             | GCA_900140255         | Respiratory system        | Positive     | Positive     | negative     | negative     | negative     | negative     |
| 19               | 54                  | Mbaa0394          | M abscessus subsp abscessus        | 627             | GCA_900139895         | Respiratory system        | Positive     | Positive     | negative     | negative     | negative     | negative     |
| 20               | 221                 | Mbaa0087          | M abscessus subsp abscessus        | 103             | GCA_900135615         | Respiratory system        | Positive     | Positive     | negative     | negative     | negative     | negative     |
| 21               | 35                  | Mbaa0191          | M abscessus subsp abscessus        | 291             | GCA_900131915         | Respiratory system        | Positive     | Positive     | negative     | negative     | negative     | negative     |
| 22               | 189                 | Mbaa1477          | M abscessus                        | GZ002           | GCA_004028015         | Homo sapiens              | Positive     | Positive     | negative     | negative     | negative     | negative     |
| 23               | 190                 | Mbaa1341          | M abscessus                        | 7C              | GCA_003586385         | Not available             | Positive     | Positive     | negative     | negative     | negative     | negative     |
| 24               | 192                 | Mbaa1499          | M abscessus                        | NCTC13031       | GCA_900453225         | Not available             | Positive     | Positive     | negative     | negative     | negative     | negative     |
| 25               | 191                 | Mbaa0835          | M abscessus subsp abscessus        | ATCC-19977      | GCA_000069185         | Not available             | Positive     | Positive     | negative     | negative     | negative     | negative     |
| 26               | 64                  | Mbaa0422          | M abscessus subsp abscessus        | 664             | GCA_900140095         | Respiratory system        | Positive     | Positive     | negative     | negative     | negative     | negative     |
| 27               | 107                 | Mbaa1478          | M abscessus                        | GZ0-1           | GCA_004027995         | Homo sapiens              | Positive     | Positive     | negative     | negative     | negative     | negative     |
| 28               | 119                 | Mbaa1503          | M abscessus                        | PAP004          | GCA_001213565         | sputum                    | Positive     | Positive     | negative     | negative     | negative     | negative     |
| 29               | 70                  | Mbaa1363          | M abscessus                        | FLAC029         | GCA_001606315         | Homo sapiens              | Positive     | Positive     | negative     | negative     | negative     | negative     |
| 30               | 69                  | Mbaa1362          | M abscessus                        | FLAC028         | GCA_001677155         | Homo sapiens              | Positive     | Positive     | negative     | negative     | negative     | negative     |
| 31               | 80                  | Mbaa0793          | M abscessus subsp abscessus        | A243            | GCA_002800545         | sputum                    | Positive     | Positive     | negative     | negative     | negative     | negative     |
| 32               | 159                 | Mbaa0068          | M abscessus subsp abscessus        | 72              | GCA_900135555         | Respiratory system        | Positive     | Positive     | negative     | negative     | negative     | negative     |
| 33               | 218                 | Mbaa1317          | M abscessus                        | 3A-0810-R       | GCA_000271105         | bronchial alveolar lavage | Positive     | Positive     | negative     | negative     | negative     | negative     |
| 34               | 219                 | Mbaa1314          | M abscessus                        | 3A-0122-R       | GCA_000270845         | sputum                    | Positive     | Positive     | negative     | negative     | negative     | negative     |
| 35               | 296                 | Mbaa0091          | M abscessus subsp abscessus        | 108             | GCA_900136685         | Respiratory system        | Positive     | Positive     | negative     | negative     | negative     | negative     |
| 36               | 310                 | Mbaa0017          | M abscessus subsp abscessus        | 16              | GCA_900139395         | Respiratory system        | Positive     | Positive     | negative     | negative     | negative     | negative     |
| 37               | 383                 | Mbaa0200          | M abscessus subsp abscessus        | 314             | GCA_900132135         | Respiratory system        | Positive     | Positive     | negative     | negative     | negative     | negative     |
| 38               | 393                 | Mbaa0190          | M abscessus subsp abscessus        | 289             | GCA_002801965         | sputum                    | Positive     | Positive     | negative     | negative     | negative     | negative     |
| 39               | 386                 | Mbaa0800          | M abscessus subsp abscessus        | A297            | GCA_002800225         | sputum                    | Positive     | Positive     | negative     | negative     | negative     | negative     |
| 40               | 398                 | Mbaa0021          | M abscessus subsp abscessus        | 21              | GCA_002800385         | lavage fluid              | Positive     | Positive     | negative     | negative     | negative     | negative     |
| 41               | 331                 | Mbaa0381          | M abscessus subsp abscessus        | 610             | GCA_900139075         | Respiratory system        | Positive     | Positive     | negative     | negative     | negative     | negative     |
| 42               | 330                 | Mbaa0426          | M abscessus subsp abscessus        | 669             | GCA_900139165         | Respiratory system        | Positive     | Positive     | negative     | negative     | negative     | negative     |
| 43               | 339                 | Mbaa0786          | M abscessus subsp abscessus        | A213            | GCA_002800875         | sputum                    | Positive     | Positive     | negative     | negative     | negative     | negative     |
| 44               | 337                 | Mbaa0318          | M abscessus subsp abscessus        | 501             | GCA_900136485         | Respiratory system        | Positive     | Positive     | negative     | negative     | negative     | negative     |
| 45               | 317                 | Mbaa0782          | M abscessus subsp abscessus        | A183            | GCA_002800235         | sputum                    | Positive     | negative     | negative     | negative     | negative     | negative     |
| 46               | 320                 | Mbaa0775          | M abscessus subsp abscessus        | 6382            | GCA_002800275         | lavage fluid              | Positive     | negative     | negative     | negative     | negative     | negative     |
| 47               | 318                 | Mbaa0810          | M abscessus subsp abscessus        | A330            | GCA_002800205         | lavage fluid              | Positive     | negative     | negative     | negative     | negative     | negative     |
| 48               | 326                 | Mbaa0171          | M abscessus subsp abscessus        | 254             | GCA_002801975         | lavage fluid              | Positive     | Positive     | negative     | negative     | negative     | negative     |
| 49               | 328                 | Mbaa0831          | M abscessus subsp abscessus        | A69             | GCA_002800255         | sputum                    | Positive     | Positive     | negative     | negative     | negative     | negative     |
| 50               | 355                 | Mbaa0269          | M abscessus subsp abscessus        | 420             | GCA_900134005         | Respiratory system        | Positive     | Positive     | negative     | negative     | negative     | negative     |
| 51               | 360                 | Mbaa0232          | M abscessus subsp abscessus        | 371             | GCA_900133265         | Respiratory system        | Positive     | Positive     | negative     | negative     | negative     | negative     |

|     |     |          |                             |              |               |                    |          |          |          |          |          |          |
|-----|-----|----------|-----------------------------|--------------|---------------|--------------------|----------|----------|----------|----------|----------|----------|
| 52  | 350 | Mbaa0235 | M abscessus subsp abscessus | 374          | GCA_900133295 | Respiratory system | Positive | Positive | negative | negative | negative | negative |
| 53  | 411 | Mbaa0044 | M abscessus subsp abscessus | 44           | GCA_900135305 | Respiratory system | Positive | Positive | negative | negative | negative | negative |
| 54  | 348 | Mbaa0304 | M abscessus subsp abscessus | 475          | GCA_900138835 | Respiratory system | Positive | Positive | negative | negative | negative | negative |
| 55  | 402 | Mbaa0143 | M abscessus subsp abscessus | 214          | GCA_900130915 | Respiratory system | Positive | Positive | negative | negative | negative | negative |
| 56  | 399 | Mbaa0148 | M abscessus subsp abscessus | 217          | GCA_900130935 | Respiratory system | Positive | Positive | negative | negative | negative | negative |
| 57  | 401 | Mbaa0836 | M abscessus subsp abscessus | Bamboo       | GCA_002072635 | Sputum             | Positive | Positive | negative | negative | negative | negative |
| 58  | 404 | Mbaa0019 | M abscessus subsp abscessus | 19           | GCA_900135115 | Respiratory system | Positive | Positive | negative | negative | negative | negative |
| 59  | 514 | Mbaa0435 | M abscessus subsp abscessus | 679          | GCA_900139705 | Respiratory system | Positive | Positive | negative | negative | negative | negative |
| 60  | 508 | Mbaa0261 | M abscessus subsp abscessus | 408          | GCA_900138995 | Respiratory system | Positive | Positive | Positive | negative | negative | negative |
| 61  | 502 | Mbaa0285 | M abscessus subsp abscessus | 439          | GCA_900134725 | Respiratory system | Positive | Positive | Positive | negative | negative | negative |
| 62  | 509 | Mbaa0756 | M abscessus subsp abscessus | 3476         | GCA_002800315 | sputum             | Positive | Positive | negative | negative | negative | negative |
| 63  | 499 | Mbaa0163 | M abscessus subsp abscessus | 242          | GCA_900131275 | Respiratory system | Positive | Positive | negative | negative | negative | negative |
| 64  | 540 | Mbaa1482 | M abscessus                 | M152         | GCA_000280615 | sputum             | Positive | Positive | negative | negative | negative | negative |
| 65  | 468 | Mbaa0129 | M abscessus subsp abscessus | 180          | GCA_900130595 | Respiratory system | Positive | Positive | negative | negative | negative | negative |
| 66  | 455 | Mbaa0287 | M abscessus subsp abscessus | 444          | GCA_900134805 | Respiratory system | Positive | Positive | negative | negative | negative | negative |
| 67  | 452 | Mbaa0186 | M abscessus subsp abscessus | 281          | GCA_900131675 | Respiratory system | Positive | Positive | negative | negative | negative | negative |
| 68  | 461 | Mbaa0215 | M abscessus subsp abscessus | 340          | GCA_900132855 | Respiratory system | Positive | Positive | negative | negative | negative | negative |
| 69  | 467 | Mbaa0174 | M abscessus subsp abscessus | 258          | GCA_900131415 | Respiratory system | Positive | Positive | negative | negative | negative | negative |
| 70  | 470 | Mbaa0003 | M abscessus subsp abscessus | 2            | GCA_900138755 | Respiratory system | Positive | Positive | negative | negative | negative | negative |
| 71  | 438 | Mbaa0302 | M abscessus subsp abscessus | 472          | GCA_900138785 | Respiratory system | Positive | Positive | negative | negative | negative | negative |
| 72  | 449 | Mbaa0109 | M abscessus subsp abscessus | 140          | GCA_900139615 | Respiratory system | Positive | Positive | negative | negative | negative | negative |
| 73  | 424 | Mbaa0351 | M abscessus subsp abscessus | 575          | GCA_900139045 | Respiratory system | Positive | Positive | negative | negative | negative | negative |
| 74  | 496 | Mbaa0777 | M abscessus subsp abscessus | 06_0524      | GCA_001942565 | seakrait           | Positive | Positive | negative | negative | negative | negative |
| 75  | 495 | Mbaa1489 | M abscessus                 | M94          | GCA_000257245 | sputum             | Positive | Positive | negative | negative | negative | negative |
| 76  | 498 | Mbaa0139 | M abscessus subsp abscessus | 209          | GCA_900140335 | Respiratory system | Positive | Positive | negative | negative | negative | negative |
| 77  | 567 | Mbaa0124 | M abscessus subsp abscessus | 172          | GCA_900130495 | Respiratory system | Positive | Positive | negative | negative | negative | negative |
| 78  | 560 | Mbaa0127 | M abscessus subsp abscessus | 176          | GCA_900130555 | Respiratory system | Positive | Positive | negative | negative | negative | negative |
| 79  | 563 | Mbaa0176 | M abscessus subsp abscessus | 264          | GCA_900140435 | Respiratory system | Positive | Positive | negative | negative | negative | negative |
| 80  | 562 | Mbaa0159 | M abscessus subsp abscessus | 233          | GCA_900131195 | Respiratory system | Positive | Positive | negative | negative | negative | negative |
| 81  | 566 | Mbaa0173 | M abscessus subsp abscessus | 255          | GCA_900131395 | Respiratory system | Positive | Positive | negative | negative | negative | negative |
| 82  | 565 | Mbaa0161 | M abscessus subsp abscessus | 235          | GCA_900131185 | Respiratory system | Positive | Positive | negative | negative | negative | negative |
| 83  | 561 | Mbaa0130 | M abscessus subsp abscessus | 181          | GCA_900130605 | Respiratory system | Positive | Positive | negative | negative | negative | negative |
| 84  | 564 | Mbaa0165 | M abscessus subsp abscessus | 245          | GCA_900131285 | Respiratory system | Positive | Positive | negative | negative | negative | negative |
| 85  | 568 | Mbaa1305 | M abscessus                 | 21           | GCA_000523835 | sputum             | Positive | Positive | negative | negative | negative | negative |
| 86  | 546 | Mbaa0799 | M abscessus subsp abscessus | A274         | GCA_002801095 | sputum             | Positive | Positive | negative | negative | negative | negative |
| 87  | 545 | Mbaa0114 | M abscessus subsp abscessus | 146          | GCA_002802645 | sputum             | Positive | Positive | negative | negative | negative | negative |
| 88  | 548 | Mbaa0277 | M abscessus subsp abscessus | 429          | GCA_900134985 | Respiratory system | Positive | Positive | negative | negative | negative | negative |
| 89  | 547 | Mbaa0278 | M abscessus subsp abscessus | 430          | GCA_900135005 | Respiratory system | Positive | Positive | negative | negative | negative | negative |
| 90  | 553 | Mbaa0144 | M abscessus subsp abscessus | 215          | GCA_002801165 | sputum             | Positive | Positive | negative | negative | negative | negative |
| 91  | 552 | Mbaa0787 | M abscessus subsp abscessus | A215         | GCA_002801115 | sputum             | Positive | Positive | negative | negative | negative | negative |
| 92  | 551 | Mbaa0811 | M abscessus subsp abscessus | A337         | GCA_002802525 | sputum             | Positive | Positive | negative | negative | negative | negative |
| 93  | 571 | Mbaa0099 | M abscessus subsp abscessus | 122          | GCA_900136815 | Respiratory system | Positive | Positive | negative | negative | negative | negative |
| 94  | 737 | Mbaa0085 | M abscessus subsp abscessus | 101          | GCA_900135575 | Respiratory system | Positive | Positive | negative | negative | negative | negative |
| 95  | 824 | Mbaa0041 | M abscessus subsp abscessus | 40           | GCA_900135255 | Respiratory system | Positive | Positive | negative | negative | negative | negative |
| 96  | 761 | Mbaa0323 | M abscessus subsp abscessus | 506          | GCA_900136545 | Respiratory system | Positive | Positive | negative | negative | negative | negative |
| 97  | 760 | Mbaa0839 | M abscessus subsp abscessus | Patient_2_S1 | GCA_900683455 | Not available      | Positive | Positive | negative | negative | negative | negative |
| 98  | 741 | Mbaa0175 | M abscessus subsp abscessus | 263          | GCA_900131765 | Respiratory system | Positive | Positive | negative | negative | negative | negative |
| 99  | 740 | Mbaa0837 | M abscessus subsp abscessus | MA667        | GCA_004025145 | sputum             | Positive | Positive | negative | negative | negative | negative |
| 100 | 681 | Mbaa0316 | M abscessus subsp abscessus | 498          | GCA_900136565 | Respiratory system | Positive | Positive | negative | negative | negative | negative |
| 101 | 764 | Mbaa0838 | M abscessus subsp abscessus | Patient_1_S1 | GCA_900683445 | Not available      | negative | Positive | negative | negative | negative | negative |
| 102 | 751 | Mbaa0364 | M abscessus subsp abscessus | 590          | GCA_900139965 | Respiratory system | Positive | Positive | negative | negative | negative | negative |
| 103 | 755 | Mbaa1361 | M abscessus                 | FLAC015      | GCA_002142845 | Homo sapiens       | Positive | Positive | negative | negative | negative | negative |
| 104 | 818 | Mbaa0346 | M abscessus subsp abscessus | 550          | GCA_900138005 | Respiratory system | Positive | Positive | negative | negative | negative | negative |

|     |      |          |                             |            |               |                        |          |          |          |          |          |          |
|-----|------|----------|-----------------------------|------------|---------------|------------------------|----------|----------|----------|----------|----------|----------|
| 105 | 827  | Mbaa0297 | M abscessus subsp abscessus | 462        | GCA_900138745 | Respiratory system     | Positive | Positive | negative | negative | negative | negative |
| 106 | 825  | Mbaa0268 | M abscessus subsp abscessus | 419        | GCA_900139015 | Respiratory system     | Positive | Positive | negative | negative | negative | negative |
| 107 | 831  | Mbaa0217 | M abscessus subsp abscessus | 343        | GCA_900132775 | Respiratory system     | Positive | Positive | negative | negative | negative | negative |
| 108 | 826  | Mbaa0290 | M abscessus subsp abscessus | 447        | GCA_900134825 | Respiratory system     | Positive | Positive | negative | negative | negative | negative |
| 109 | 844  | Mbaa0070 | M abscessus subsp abscessus | 74         | GCA_900133505 | Respiratory system     | Positive | Positive | negative | negative | negative | negative |
| 110 | 842  | Mbaa0816 | M abscessus subsp abscessus | A377       | GCA_002800415 | lavage fluid           | Positive | Positive | negative | negative | negative | negative |
| 111 | 840  | Mbaa1424 | M abscessus                 | G164       | GCA_003582435 | sputum                 | Positive | Positive | negative | negative | negative | negative |
| 112 | 843  | Mbaa0779 | M abscessus subsp abscessus | A175       | GCA_002800605 | sputum                 | Positive | Positive | negative | negative | negative | negative |
| 113 | 868  | Mbaa0078 | M abscessus subsp abscessus | 89         | GCA_900139515 | Respiratory system     | Positive | Positive | negative | negative | negative | negative |
| 114 | 859  | Mbaa0308 | M abscessus subsp abscessus | 484        | GCA_900138895 | Respiratory system     | Positive | Positive | negative | negative | negative | negative |
| 115 | 865  | Mbaa0784 | M abscessus subsp abscessus | A197       | GCA_002800585 | lavage fluid           | Positive | Positive | negative | negative | negative | negative |
| 116 | 862  | Mbaa0107 | M abscessus subsp abscessus | 131        | GCA_900139535 | Respiratory system     | Positive | Positive | negative | negative | negative | negative |
| 117 | 869  | Mbaa1660 | M abscessus                 | UC22       | GCA_001050395 | pulmonary disease      | Positive | Positive | negative | negative | negative | negative |
| 118 | 872  | Mbaa1309 | M abscessus                 | 206        | GCA_003072365 | sputum                 | Positive | Positive | negative | negative | negative | negative |
| 119 | 870  | Mbaa0815 | M abscessus subsp abscessus | A373       | GCA_002802485 | lavage fluid           | Positive | Positive | negative | negative | negative | negative |
| 120 | 881  | Mbaa0105 | M abscessus subsp abscessus | 129        | GCA_002801245 | sputum                 | Positive | Positive | negative | negative | negative | negative |
| 121 | 884  | Mbaa1365 | M abscessus                 | FLAC031    | GCA_001606335 | Homo sapiens           | Positive | Positive | negative | negative | negative | negative |
| 122 | 887  | Mbaa0334 | M abscessus subsp abscessus | 522        | GCA_900140165 | Respiratory system     | Positive | Positive | negative | negative | negative | negative |
| 123 | 886  | Mbaa0328 | M abscessus subsp abscessus | 513        | GCA_900140145 | Respiratory system     | Positive | Positive | negative | negative | negative | negative |
| 124 | 888  | Mbaa0301 | M abscessus subsp abscessus | 470        | GCA_900138765 | Respiratory system     | Positive | Positive | negative | negative | negative | negative |
| 125 | 899  | Mbaa0812 | M abscessus subsp abscessus | A35        | GCA_002802435 | sputum                 | Positive | Positive | negative | negative | negative | negative |
| 126 | 905  | Mbaa0189 | M abscessus subsp abscessus | 288        | GCA_002802615 | sputum                 | Positive | Positive | negative | negative | negative | negative |
| 127 | 660  | Mbaa1321 | M abscessus                 | 4S-0116-R  | GCA_000270685 | sputum                 | Positive | Positive | negative | negative | negative | negative |
| 128 | 658  | Mbaa1326 | M abscessus                 | 4S-0726-RB | GCA_000271265 | sputum                 | Positive | Positive | negative | negative | negative | negative |
| 129 | 653  | Mbaa0470 | M abscessus subsp abscessus | 722        | GCA_900139295 | Respiratory system     | Positive | Positive | negative | negative | negative | negative |
| 130 | 907  | Mbaa0182 | M abscessus subsp abscessus | 277        | GCA_900131645 | Respiratory system     | Positive | Positive | negative | negative | negative | negative |
| 131 | 906  | Mbaa0395 | M abscessus subsp abscessus | 629        | GCA_900140815 | Respiratory system     | Positive | Positive | negative | negative | negative | negative |
| 132 | 908  | Mbaa0121 | M abscessus subsp abscessus | 165        | GCA_900130265 | Respiratory system     | Positive | Positive | negative | negative | negative | negative |
| 133 | 909  | Mbaa0794 | M abscessus subsp abscessus | A244       | GCA_002801575 | sputum                 | Positive | Positive | negative | negative | negative | negative |
| 134 | 1014 | Mbaa0023 | M abscessus subsp abscessus | 22         | GCA_002802765 | sputum                 | Positive | Positive | negative | negative | negative | negative |
| 135 | 1011 | Mbaa0797 | M abscessus subsp abscessus | A255       | GCA_002802695 | lavage fluid           | Positive | Positive | negative | negative | negative | negative |
| 136 | 1006 | Mbaa0431 | M abscessus subsp abscessus | 674        | GCA_900139155 | Respiratory system     | Positive | Positive | negative | negative | negative | negative |
| 137 | 1008 | Mbaa0128 | M abscessus subsp abscessus | 178        | GCA_002801685 | lavage fluid           | Positive | Positive | negative | negative | negative | negative |
| 138 | 996  | Mbaa1421 | M abscessus                 | G160       | GCA_003071705 | Bronchoalveolar lavage | Positive | Positive | negative | negative | negative | negative |
| 139 | 997  | Mbaa0814 | M abscessus subsp abscessus | A353       | GCA_002802655 | sputum                 | Positive | Positive | negative | negative | negative | negative |
| 140 | 1000 | Mbaa1447 | M abscessus                 | G201       | GCA_003582005 | sputum                 | Positive | Positive | negative | negative | negative | negative |
| 141 | 987  | Mbaa0164 | M abscessus subsp abscessus | 244        | GCA_002800855 | sputum                 | Positive | Positive | negative | negative | negative | negative |
| 142 | 985  | Mbaa0823 | M abscessus subsp abscessus | A477       | GCA_002802295 | sputum                 | Positive | Positive | negative | negative | negative | negative |
| 143 | 983  | Mbaa0805 | M abscessus subsp abscessus | A315       | GCA_002801425 | lavage fluid           | Positive | Positive | negative | negative | negative | negative |
| 144 | 975  | Mbaa0789 | M abscessus subsp abscessus | A218       | GCA_002801435 | sputum                 | Positive | Positive | negative | negative | negative | negative |
| 145 | 992  | Mbaa0432 | M abscessus subsp abscessus | 675        | GCA_900139205 | Respiratory system     | Positive | Positive | negative | negative | negative | negative |
| 146 | 977  | Mbaa0840 | M abscessus subsp abscessus | Z58        | GCA_000611915 | pneumonia patient      | Positive | Positive | negative | negative | negative | negative |
| 147 | 978  | Mbaa1663 | M abscessus                 | Z61        | GCA_000611935 | pneumonia patient      | Positive | Positive | negative | negative | negative | negative |
| 148 | 980  | Mbaa0796 | M abscessus subsp abscessus | A25        | GCA_002801015 | sputum                 | Positive | Positive | negative | negative | negative | negative |
| 149 | 981  | Mbaa0791 | M abscessus subsp abscessus | A232       | GCA_002801105 | sputum                 | Positive | Positive | negative | negative | negative | negative |
| 150 | 960  | Mbaa0746 | M abscessus subsp abscessus | 1866       | GCA_002802845 | lavage fluid           | Positive | Positive | negative | negative | negative | negative |
| 151 | 958  | Mbaa0755 | M abscessus subsp abscessus | 3384       | GCA_002801345 | lavage fluid           | Positive | Positive | negative | negative | negative | negative |
| 152 | 969  | Mbaa0807 | M abscessus subsp abscessus | A321       | GCA_002802335 | lavage fluid           | Positive | Positive | negative | negative | negative | negative |
| 153 | 1021 | Mbaa0771 | M abscessus subsp abscessus | 5725       | GCA_002802685 | lavage fluid           | Positive | Positive | negative | negative | negative | negative |
| 154 | 1024 | Mbaa0745 | M abscessus subsp abscessus | 1791       | GCA_002802585 | sputum                 | Positive | Positive | negative | negative | negative | negative |
| 155 | 1020 | Mbaa0809 | M abscessus subsp abscessus | A329       | GCA_002802415 | sputum                 | Positive | Positive | negative | negative | negative | negative |
| 156 | 1022 | Mbaa0817 | M abscessus subsp abscessus | A378       | GCA_002801585 | sputum                 | Positive | Positive | negative | negative | negative | negative |
| 157 | 1018 | Mbaa0750 | M abscessus subsp abscessus | 2767       | GCA_002802205 | sputum                 | negative | Positive | negative | negative | negative | negative |

|     |      |          |                               |                 |               |                           |          |          |          |          |          |          |
|-----|------|----------|-------------------------------|-----------------|---------------|---------------------------|----------|----------|----------|----------|----------|----------|
| 158 | 598  | Mbaa0073 | M abscessus subsp abscessus   | 79              | GCA_900134165 | Respiratory system        | Positive | Positive | negative | negative | negative | negative |
| 159 | 583  | Mbaa0781 | M abscessus subsp abscessus   | A182            | GCA_002800805 | lavage fluid              | Positive | Positive | negative | negative | negative | negative |
| 160 | 607  | Mbaa0029 | M abscessus subsp abscessus   | 27              | GCA_002800965 | lavage fluid              | Positive | Positive | negative | negative | negative | negative |
| 161 | 573  | Mbaa0311 | M abscessus subsp abscessus   | 488             | GCA_900138945 | Respiratory system        | Positive | Positive | negative | negative | negative | negative |
| 162 | 612  | Mbaa0020 | M abscessus subsp abscessus   | 20              | GCA_900135155 | Respiratory system        | Positive | Positive | negative | negative | negative | negative |
| 163 | 1016 | Mbaa1490 | M abscessus                   | MAB_030201_1061 | GCA_000523775 | bronchoalveolar lavage    | Positive | Positive | negative | negative | negative | negative |
| 164 | 640  | Mbaa0392 | M abscessus subsp abscessus   | 625             | GCA_900140795 | Respiratory system        | Positive | Positive | negative | negative | negative | negative |
| 165 | 637  | Mbaa0429 | M abscessus subsp abscessus   | 672             | GCA_900141025 | Respiratory system        | Positive | Positive | negative | negative | negative | negative |
| 166 | 632  | Mbaa0380 | M abscessus subsp abscessus   | 608             | GCA_900139815 | Respiratory system        | Positive | Positive | negative | negative | negative | negative |
| 167 | 642  | Mbaa0828 | M abscessus subsp abscessus   | A54             | GCA_002801255 | sputum                    | Positive | Positive | negative | negative | negative | negative |
| 168 | 941  | Mbaa1488 | M abscessus                   | M93             | GCA_000257225 | sputum                    | negative | Positive | negative | negative | negative | negative |
| 169 | 943  | Mbaa0185 | M abscessus subsp abscessus   | 280             | GCA_900131665 | Respiratory system        | Positive | Positive | negative | negative | negative | negative |
| 170 | 942  | Mbaa0207 | M abscessus subsp abscessus   | 329             | GCA_900140415 | Respiratory system        | Positive | Positive | negative | negative | negative | negative |
| 171 | 931  | Mbaa0352 | M abscessus subsp abscessus   | 576             | GCA_900141285 | Respiratory system        | Positive | Positive | negative | negative | negative | negative |
| 172 | 929  | Mbaa1370 | M abscessus                   | FLAC049         | GCA_001610655 | Homo sapiens              | Positive | Positive | negative | negative | negative | negative |
| 173 | 932  | Mbaa0455 | M abscessus subsp abscessus   | 706             | GCA_900139675 | Respiratory system        | Positive | Positive | negative | negative | negative | negative |
| 174 | 928  | Mbaa0224 | M abscessus subsp abscessus   | 355             | GCA_900132665 | Respiratory system        | Positive | Positive | negative | negative | negative | negative |
| 175 | 933  | Mbaa0758 | M abscessus subsp abscessus   | 3617            | GCA_002801355 | lavage fluid              | Positive | Positive | negative | negative | negative | negative |
| 176 | 661  | Mbaa0137 | M abscessus subsp abscessus   | 205             | GCA_002801325 | sputum                    | Positive | Positive | negative | negative | negative | negative |
| 177 | 913  | Mbaa0339 | M abscessus subsp abscessus   | 533             | GCA_900140245 | Respiratory system        | Positive | Positive | negative | negative | negative | negative |
| 178 | 914  | Mbaa0338 | M abscessus subsp abscessus   | 531             | GCA_900139925 | Respiratory system        | Positive | Positive | negative | negative | negative | negative |
| 179 | 911  | Mbaa0340 | M abscessus subsp abscessus   | 534             | GCA_900139945 | Respiratory system        | Positive | Positive | negative | negative | negative | negative |
| 180 | 534  | Mbaa0153 | M abscessus subsp abscessus   | 223             | GCA_900131075 | Respiratory system        | Positive | Positive | negative | negative | negative | negative |
| 181 | 535  | Mbaa0239 | M abscessus subsp abscessus   | 379             | GCA_900133325 | Respiratory system        | Positive | Positive | negative | negative | negative | negative |
| 182 | 521  | Mbaa0233 | M abscessus subsp abscessus   | 372             | GCA_900133275 | Respiratory system        | Positive | Positive | negative | negative | negative | negative |
| 183 | 526  | Mbaa0135 | M abscessus subsp abscessus   | 196             | GCA_900140325 | Respiratory system        | Positive | Positive | negative | negative | negative | negative |
| 184 | 1178 | Mbam1044 | M abscessus subsp massiliense | 307             | GCA_900132075 | Respiratory system        | negative | negative | negative | negative | Positive | Positive |
| 185 | 1214 | Mbam1052 | M abscessus subsp massiliense | 346             | GCA_900132815 | Respiratory system        | negative | negative | negative | negative | Positive | Positive |
| 186 | 1193 | Mbam1495 | M abscessus                   | MAB_091912_2455 | GCA_000523915 | Homo sapiens              | negative | negative | negative | negative | Positive | Positive |
| 187 | 1187 | Mbam0943 | M abscessus subsp bolletii    | 2B-0107         | GCA_000270945 | sputum                    | negative | negative | negative | negative | Positive | Positive |
| 188 | 1288 | Mbam1492 | M abscessus                   | MAB_082312_2258 | GCA_000500165 | sputum                    | negative | negative | negative | negative | Positive | Positive |
| 189 | 1188 | Mbam0944 | M abscessus subsp bolletii    | 2B-0307         | GCA_000270765 | sputum                    | negative | negative | negative | negative | Positive | Positive |
| 190 | 1190 | Mbam0947 | M abscessus subsp bolletii    | 2B-0912-S       | GCA_000270785 | sputum                    | negative | negative | negative | negative | Positive | Positive |
| 191 | 1189 | Mbam0945 | M abscessus subsp bolletii    | 2B-0626         | GCA_000270905 | bronchial alveolar lavage | negative | negative | negative | negative | Positive | Positive |
| 192 | 1195 | Mbam1226 | M abscessus subsp massiliense | 3166            | GCA_002800055 | sputum                    | negative | negative | negative | negative | Positive | Positive |
| 193 | 1196 | Mbam1253 | M abscessus subsp massiliense | A126            | GCA_002801765 | sputum                    | negative | negative | negative | negative | Positive | Positive |
| 194 | 1218 | Mbam1064 | M abscessus subsp massiliense | 451             | GCA_900134865 | Respiratory system        | negative | negative | negative | negative | Positive | Positive |
| 195 | 1198 | Mbam1385 | M abscessus                   | G110            | GCA_003582945 | sputum                    | negative | negative | negative | negative | Positive | Positive |
| 196 | 1166 | Mbam1274 | M abscessus subsp massiliense | A63             | GCA_002799645 | sputum                    | negative | negative | negative | negative | Positive | Positive |
| 197 | 1094 | Mbam0998 | M abscessus subsp massiliense | 192             | GCA_900130745 | Respiratory system        | negative | negative | negative | negative | Positive | Positive |
| 198 | 1100 | Mbam1356 | M abscessus                   | FLAC007         | GCA_001606255 | Homo sapiens              | negative | negative | negative | negative | Positive | Positive |
| 199 | 1095 | Mbam1353 | M abscessus                   | FLAC004         | GCA_001606215 | Homo sapiens              | negative | negative | negative | negative | Positive | Positive |
| 200 | 1083 | Mbam1050 | M abscessus subsp massiliense | 326             | GCA_900132385 | Respiratory system        | negative | negative | negative | negative | Positive | Positive |
| 201 | 1090 | Mbam1367 | M abscessus                   | FLAC045         | GCA_001610615 | Homo sapiens              | negative | negative | negative | negative | Positive | Positive |
| 202 | 1107 | Mbam0996 | M abscessus subsp massiliense | 186             | GCA_900130625 | Respiratory system        | negative | negative | negative | negative | Positive | Positive |
| 203 | 1025 | Mbam1223 | M abscessus subsp massiliense | 1178            | GCA_900138495 | Respiratory system        | negative | negative | negative | negative | Positive | Positive |
| 204 | 1102 | Mbam0966 | M abscessus subsp massiliense | 111             | GCA_002800155 | lavage fluid              | negative | negative | negative | negative | Positive | Positive |
| 205 | 1127 | Mbam0953 | M abscessus subsp bolletii    | M18             | GCA_000261085 | lymph node                | negative | negative | negative | negative | Positive | Positive |
| 206 | 1128 | Mbam1046 | M abscessus subsp massiliense | 309             | GCA_900132105 | Respiratory system        | negative | negative | negative | negative | Positive | Positive |
| 207 | 1274 | Mbam0960 | M abscessus subsp massiliense | 60              | GCA_002801905 | sputum                    | negative | negative | negative | negative | Positive | Positive |
| 208 | 1270 | Mbam0951 | M abscessus subsp bolletii    | CRM-0020        | GCA_000418575 | skin                      | negative | negative | negative | negative | Positive | Positive |
| 209 | 1271 | Mbam0952 | M abscessus subsp bolletii    | INCQS-00594     | GCA_000363915 | surgical-site abscess     | negative | negative | negative | negative | Positive | Positive |
| 210 | 1273 | Mbam1301 | M abscessus subsp massiliense | GO-06           | GCA_000277775 | Not available             | negative | negative | negative | negative | Positive | Positive |

|     |      |          |                               |             |               |                           |          |          |          |          |          |          |
|-----|------|----------|-------------------------------|-------------|---------------|---------------------------|----------|----------|----------|----------|----------|----------|
| 211 | 1301 | Mbam0940 | M abscessus subsp bolletii    | IS-152-0914 | GCA_000271285 | bronchial alveolar lavage | negative | negative | negative | negative | Positive | Positive |
| 212 | 1291 | Mbam0941 | M abscessus subsp bolletii    | IS-153-0915 | GCA_000270885 | sputum                    | negative | negative | negative | negative | Positive | Positive |
| 213 | 1292 | Mbam1060 | M abscessus subsp massiliense | 416         | GCA_900134025 | Respiratory system        | negative | negative | negative | negative | Positive | Positive |
| 214 | 1313 | Mbam1265 | M abscessus subsp massiliense | A295        | GCA_002799775 | sputum                    | negative | negative | negative | negative | Positive | Positive |
| 215 | 1310 | Mbam1225 | M abscessus subsp massiliense | 3106        | GCA_002801875 | sputum                    | negative | negative | negative | negative | Positive | Positive |
| 216 | 1297 | Mbam1229 | M abscessus subsp massiliense | 4070        | GCA_002800025 | sputum                    | negative | negative | negative | negative | Positive | Positive |
| 217 | 1305 | Mbam1081 | M abscessus subsp massiliense | 535         | GCA_900139755 | Respiratory system        | negative | negative | negative | negative | Positive | Positive |
| 218 | 1303 | Mbam1467 | M abscessus                   | G85         | GCA_003071885 | Bronchoalveolar lavage    | negative | negative | negative | negative | Positive | Positive |
| 219 | 1323 | Mbam0956 | M abscessus subsp massiliense | 26          | GCA_900135175 | Respiratory system        | negative | negative | negative | negative | Positive | Positive |
| 220 | 1304 | Mbam1264 | M abscessus subsp massiliense | A289        | GCA_002801735 | sputum                    | negative | negative | negative | negative | Positive | Positive |
| 221 | 1309 | Mbam1042 | M abscessus subsp massiliense | 303         | GCA_900132035 | Respiratory system        | negative | negative | negative | negative | Positive | Positive |
| 222 | 1385 | Mbam1485 | M abscessus                   | M159        | GCA_000261105 | sputum                    | negative | negative | negative | negative | Positive | Positive |
| 223 | 1342 | Mbam0938 | M abscessus subsp bolletii    | 50594       | GCA_000445035 | Not available             | negative | negative | negative | negative | Positive | Positive |
| 224 | 1433 | Mbam1479 | M abscessus                   | M115        | GCA_000260595 | sputum                    | negative | negative | negative | negative | Positive | Positive |
| 225 | 1360 | Mbam1071 | M abscessus subsp massiliense | 483         | GCA_900138915 | Respiratory system        | negative | negative | negative | negative | Positive | Positive |
| 226 | 1368 | Mbam0969 | M abscessus subsp massiliense | 115         | GCA_900136755 | Respiratory system        | negative | negative | negative | negative | Positive | Positive |
| 227 | 1369 | Mbam1483 | M abscessus                   | M154        | GCA_000260575 | sputum                    | negative | negative | negative | negative | Positive | Positive |
| 228 | 1355 | Mbam1272 | M abscessus subsp massiliense | A47         | GCA_002799795 | sputum                    | negative | negative | negative | negative | Positive | Positive |
| 229 | 1343 | Mbam0974 | M abscessus subsp massiliense | 132         | GCA_900139585 | Respiratory system        | negative | negative | negative | negative | Positive | Positive |
| 230 | 1357 | Mbam1231 | M abscessus subsp massiliense | 5620        | GCA_002799995 | lavage fluid              | negative | negative | negative | negative | Positive | Positive |
| 231 | 1358 | Mbam1484 | M abscessus                   | M156        | GCA_000280635 | sputum                    | negative | negative | negative | negative | Positive | Positive |
| 232 | 1359 | Mbam1486 | M abscessus                   | M172        | GCA_000261125 | sputum                    | negative | negative | negative | negative | Positive | Positive |
| 233 | 1430 | Mbam1260 | M abscessus subsp massiliense | A247        | GCA_002799855 | sputum                    | negative | negative | negative | negative | Positive | Positive |
| 234 | 1429 | Mbam1087 | M abscessus subsp massiliense | 616         | GCA_900140735 | Respiratory system        | negative | negative | negative | negative | Positive | Positive |
| 235 | 1432 | Mbam1076 | M abscessus subsp massiliense | 499         | GCA_900136495 | Respiratory system        | negative | negative | negative | negative | Positive | Positive |
| 236 | 1438 | Mbam1065 | M abscessus subsp massiliense | 452         | GCA_900134835 | Respiratory system        | negative | negative | negative | negative | Positive | Positive |
| 237 | 1439 | Mbam1303 | M abscessus subsp massiliense | Mycolpoa    | GCA_003861345 | sputum                    | negative | negative | negative | negative | negative | negative |
| 238 | 1443 | Mbam1298 | M abscessus subsp massiliense | FLAC047     | GCA_002140035 | Homo sapiens              | negative | negative | negative | negative | Positive | Positive |
| 239 | 1442 | Mbam1299 | M abscessus subsp massiliense | GD01A       | GCA_004209815 | Homo sapiens              | negative | negative | negative | negative | Positive | Positive |
| 240 | 1441 | Mbam1300 | M abscessus subsp massiliense | GD01B       | GCA_004209835 | Homo sapiens              | negative | negative | negative | negative | Positive | Positive |
| 241 | 1440 | Mbam1069 | M abscessus subsp massiliense | 478         | GCA_900138855 | Respiratory system        | negative | negative | negative | negative | Positive | Positive |
| 242 | 1460 | Mbam1364 | M abscessus                   | FLAC030     | GCA_001677175 | Homo sapiens              | negative | negative | negative | negative | Positive | Positive |
| 243 | 1459 | Mbam1098 | M abscessus subsp massiliense | 677         | GCA_900141085 | Respiratory system        | negative | negative | negative | negative | Positive | Positive |
| 244 | 1447 | Mbam1101 | M abscessus subsp massiliense | 688         | GCA_900139795 | Respiratory system        | negative | negative | negative | negative | Positive | Positive |
| 245 | 1453 | Mbam1369 | M abscessus                   | FLAC048     | GCA_001610635 | Homo sapiens              | negative | negative | negative | negative | Positive | Positive |
| 246 | 1467 | Mbam1099 | M abscessus subsp massiliense | 681         | GCA_900141135 | Respiratory system        | Positive | negative | negative | negative | Positive | Positive |
| 247 | 1490 | Mbam1302 | M abscessus subsp massiliense | JCM-15300   | GCA_000497265 | Not available             | negative | negative | negative | negative | Positive | Positive |
| 248 | 1489 | Mbam1297 | M abscessus subsp massiliense | CIP-108297  | GCA_001792625 | sputum, bronchial lavage  | negative | negative | negative | negative | Positive | Positive |
| 249 | 1479 | Mbam1047 | M abscessus subsp massiliense | 312         | GCA_900132125 | Respiratory system        | negative | negative | negative | negative | Positive | Positive |
| 250 | 1481 | Mbam1041 | M abscessus subsp massiliense | 301         | GCA_900132025 | Respiratory system        | negative | negative | negative | negative | Positive | Positive |
| 251 | 1480 | Mbam1051 | M abscessus subsp massiliense | 335         | GCA_900132475 | Respiratory system        | negative | negative | negative | negative | Positive | Positive |
| 252 | 1482 | Mbam1000 | M abscessus subsp massiliense | 197         | GCA_900130765 | Respiratory system        | negative | negative | negative | negative | Positive | Positive |
| 253 | 1474 | Mbam0961 | M abscessus subsp massiliense | 60          | GCA_900135445 | Respiratory system        | negative | negative | negative | negative | Positive | Positive |
| 254 | 1484 | Mbam0957 | M abscessus subsp massiliense | 58          | GCA_900135425 | Respiratory system        | negative | negative | negative | negative | Positive | Positive |
| 255 | 1470 | Mbam0959 | M abscessus subsp massiliense | 59          | GCA_900133445 | Respiratory system        | negative | negative | negative | negative | Positive | Positive |
| 256 | 1471 | Mbam1019 | M abscessus subsp massiliense | 247         | GCA_900131315 | Respiratory system        | negative | negative | negative | negative | Positive | Positive |
| 257 | 1472 | Mbam1067 | M abscessus subsp massiliense | 474         | GCA_900138795 | Respiratory system        | negative | negative | negative | negative | Positive | Positive |
| 258 | 1483 | Mbam1073 | M abscessus subsp massiliense | 492         | GCA_900136455 | Respiratory system        | negative | negative | negative | negative | Positive | Positive |
| 259 | 1504 | Mbam0981 | M abscessus subsp massiliense | 152         | GCA_900139625 | Respiratory system        | negative | negative | negative | negative | Positive | Positive |
| 260 | 1501 | Mbam1014 | M abscessus subsp massiliense | 237         | GCA_900131225 | Respiratory system        | negative | negative | negative | negative | Positive | Positive |
| 261 | 1500 | Mbam0982 | M abscessus subsp massiliense | 153         | GCA_900130355 | Respiratory system        | negative | negative | negative | negative | Positive | Positive |
| 262 | 1505 | Mbam1376 | M abscessus                   | FLAC055     | GCA_001677215 | Homo sapiens              | negative | negative | negative | negative | Positive | Positive |
| 263 | 1512 | Mbam1333 | M abscessus                   | 5S-1212     | GCA_000271025 | sputum                    | negative | negative | negative | negative | negative | negative |

|     |      |          |                               |           |               |                        |          |          |          |          |          |          |
|-----|------|----------|-------------------------------|-----------|---------------|------------------------|----------|----------|----------|----------|----------|----------|
| 264 | 1520 | Mbam0937 | M abscessus subsp bolletii    | 1513      | GCA_000523875 | sputum                 | negative | negative | negative | negative | negative | negative |
| 265 | 1513 | Mbam1328 | M abscessus                   | 5S-0421   | GCA_000271225 | sputum                 | negative | negative | negative | negative | negative | negative |
| 266 | 1514 | Mbam1327 | M abscessus                   | 5S-0304   | GCA_000271205 | sputum                 | negative | negative | negative | negative | negative | negative |
| 267 | 1516 | Mbam0971 | M abscessus subsp massiliense | 124       | GCA_900136825 | Respiratory system     | negative | negative | negative | negative | negative | negative |
| 268 | 1517 | Mbam0970 | M abscessus subsp massiliense | 123       | GCA_900136785 | Respiratory system     | negative | negative | negative | negative | negative | negative |
| 269 | 1526 | Mbam1230 | M abscessus subsp massiliense | 5601      | GCA_002799985 | sputum                 | negative | negative | negative | negative | Positive | Positive |
| 270 | 1529 | Mbam1397 | M abscessus                   | G124      | GCA_003582785 | sputum                 | negative | negative | negative | negative | Positive | Positive |
| 271 | 1527 | Mbam1259 | M abscessus subsp massiliense | A228      | GCA_002799875 | sputum                 | negative | negative | negative | negative | Positive | Positive |
| 272 | 1537 | Mbam1062 | M abscessus subsp massiliense | 441       | GCA_900138735 | Respiratory system     | negative | negative | negative | negative | Positive | Positive |
| 273 | 1521 | Mbam1074 | M abscessus subsp massiliense | 495       | GCA_900136465 | Respiratory system     | negative | negative | negative | negative | Positive | Positive |
| 274 | 1531 | Mbam1354 | M abscessus                   | FLAC005   | GCA_001606235 | Homo sapiens           | negative | negative | negative | negative | Positive | Positive |
| 275 | 1550 | Mbam1355 | M abscessus                   | FLAC006   | GCA_001677095 | Homo sapiens           | negative | negative | negative | negative | Positive | Positive |
| 276 | 1549 | Mbam1480 | M abscessus                   | M139      | GCA_000280595 | sputum                 | negative | negative | negative | negative | Positive | Positive |
| 277 | 1435 | Mbam0955 | M abscessus subsp massiliense | 12        | GCA_900139355 | Respiratory system     | negative | negative | negative | negative | Positive | Positive |
| 278 | 1434 | Mbam0954 | M abscessus subsp massiliense | 6         | GCA_900139445 | Respiratory system     | negative | negative | negative | negative | Positive | Positive |
| 279 | 1571 | Mbab0865 | M abscessus subsp bolletii    | 286       | GCA_900131745 | Respiratory system     | negative | negative | Positive | Positive | negative | negative |
| 280 | 1556 | Mbab0891 | M abscessus subsp bolletii    | 465       | GCA_900134995 | Respiratory system     | negative | negative | Positive | Positive | negative | negative |
| 281 | 1552 | Mbab0857 | M abscessus subsp bolletii    | 225       | GCA_900131095 | Respiratory system     | negative | negative | Positive | Positive | negative | negative |
| 282 | 1566 | Mbab0878 | M abscessus subsp bolletii    | 363       | GCA_900132745 | Respiratory system     | negative | negative | Positive | Positive | negative | negative |
| 283 | 1573 | Mbab0881 | M abscessus subsp bolletii    | 390       | GCA_900133415 | Respiratory system     | negative | negative | Positive | Positive | negative | negative |
| 284 | 1574 | Mbab0882 | M abscessus subsp bolletii    | 405       | GCA_900133925 | Respiratory system     | negative | negative | Positive | Positive | negative | negative |
| 285 | 1555 | Mbab0887 | M abscessus subsp bolletii    | 453       | GCA_900134845 | Respiratory system     | negative | negative | Positive | Positive | negative | negative |
| 286 | 1551 | Mbab0855 | M abscessus subsp bolletii    | 218       | GCA_900131035 | Respiratory system     | negative | negative | Positive | Positive | negative | negative |
| 287 | 1567 | Mbab0874 | M abscessus subsp bolletii    | 327       | GCA_900132405 | Respiratory system     | negative | negative | Positive | Positive | negative | negative |
| 288 | 1554 | Mbab0871 | M abscessus subsp bolletii    | 317       | GCA_900132305 | Respiratory system     | negative | negative | Positive | Positive | negative | negative |
| 289 | 1553 | Mbab0869 | M abscessus subsp bolletii    | 313       | GCA_900132145 | Respiratory system     | negative | negative | Positive | Positive | negative | negative |
| 290 | 1568 | Mbab0849 | M abscessus subsp bolletii    | 146       | GCA_900130295 | Respiratory system     | negative | negative | Positive | Positive | negative | negative |
| 291 | 1563 | Mbab0853 | M abscessus subsp bolletii    | 191       | GCA_900130735 | Respiratory system     | negative | negative | Positive | Positive | negative | negative |
| 292 | 1617 | Mbab0876 | M abscessus subsp bolletii    | 342       | GCA_900132715 | Respiratory system     | negative | negative | Positive | Positive | negative | negative |
| 293 | 1618 | Mbab0860 | M abscessus subsp bolletii    | 234       | GCA_900131215 | Respiratory system     | negative | negative | Positive | Positive | negative | negative |
| 294 | 1619 | Mbab0866 | M abscessus subsp bolletii    | 288       | GCA_900131885 | Respiratory system     | negative | negative | Positive | Positive | negative | negative |
| 295 | 1621 | Mbab0856 | M abscessus subsp bolletii    | 224       | GCA_900131105 | Respiratory system     | negative | negative | Positive | Positive | negative | negative |
| 296 | 1604 | Mbab0886 | M abscessus subsp bolletii    | 449       | GCA_900134785 | Respiratory system     | negative | negative | Positive | Positive | negative | negative |
| 297 | 1605 | Mbab0890 | M abscessus subsp bolletii    | 459       | GCA_900134905 | Respiratory system     | negative | negative | Positive | Positive | negative | negative |
| 298 | 1624 | Mbab1487 | M abscessus                   | M24       | GCA_000260615 | bronchoalveolar lavage | negative | Positive | Positive | Positive | negative | negative |
| 299 | 1609 | Mbab0863 | M abscessus subsp bolletii    | 265       | GCA_900131555 | Respiratory system     | negative | negative | Positive | Positive | negative | negative |
| 300 | 1610 | Mbab0850 | M abscessus subsp bolletii    | 171       | GCA_900130485 | Respiratory system     | negative | negative | Positive | Positive | negative | negative |
| 301 | 1603 | Mbab0892 | M abscessus subsp bolletii    | 479       | GCA_900138865 | Respiratory system     | negative | negative | Positive | Positive | negative | negative |
| 302 | 1596 | Mbab0842 | M abscessus subsp bolletii    | 36        | GCA_900135235 | Respiratory system     | negative | negative | Positive | Positive | negative | negative |
| 303 | 1597 | Mbab0843 | M abscessus subsp bolletii    | 37        | GCA_900135225 | Respiratory system     | negative | negative | Positive | Positive | negative | negative |
| 304 | 1598 | Mbab1352 | M abscessus                   | FLAC003   | GCA_001606195 | Homo sapiens           | negative | negative | Positive | Positive | negative | negative |
| 305 | 1586 | Mbab0895 | M abscessus subsp bolletii    | 515       | GCA_900140075 | Respiratory system     | negative | Positive | Positive | Positive | negative | negative |
| 306 | 1601 | Mbab0848 | M abscessus subsp bolletii    | 138       | GCA_900139635 | Respiratory system     | negative | negative | Positive | Positive | negative | negative |
| 307 | 1642 | Mbab0859 | M abscessus subsp bolletii    | 228       | GCA_900131135 | Respiratory system     | negative | negative | Positive | Positive | negative | negative |
| 308 | 1643 | Mbab0858 | M abscessus subsp bolletii    | 227       | GCA_900131125 | Respiratory system     | negative | negative | Positive | Positive | negative | negative |
| 309 | 1640 | Mbab0896 | M abscessus subsp bolletii    | 516       | GCA_900140135 | Respiratory system     | negative | negative | Positive | Positive | negative | negative |
| 310 | 1645 | Mbab0901 | M abscessus subsp bolletii    | 542       | GCA_900137935 | Respiratory system     | negative | negative | Positive | Positive | negative | negative |
| 311 | 1641 | Mbab1476 | M abscessus                   | GO_160526 | GCA_003068665 | mammary gland tissue   | negative | negative | Positive | negative | negative | negative |
| 312 | 1644 | Mbab1498 | M abscessus                   | NCTC10882 | GCA_900453325 | Not available          | negative | negative | Positive | Positive | negative | negative |
| 313 | 1654 | Mbab0950 | M abscessus subsp bolletii    | CIP108541 | GCA_002086525 | Not available          | negative | negative | Positive | Positive | negative | negative |
| 314 | 1653 | Mbab0949 | M abscessus subsp bolletii    | BD        | GCA_003609715 | Not available          | negative | negative | Positive | Positive | negative | negative |
| 315 | 1663 | Mbab0902 | M abscessus subsp bolletii    | 695       | GCA_900141195 | Respiratory system     | negative | negative | Positive | Positive | negative | negative |
| 316 | 1613 | Mbab0893 | M abscessus subsp bolletii    | 511       | GCA_900140055 | Respiratory system     | negative | negative | Positive | negative | negative | negative |



Akwni et al., Supplementary Table.

|      |      |          |                             |     |               |                    |          |          |          |          |          |          |
|------|------|----------|-----------------------------|-----|---------------|--------------------|----------|----------|----------|----------|----------|----------|
| 317  | 1612 | Mbab0897 | M abscessus subsp bolletii  | 523 | GCA_900140175 | Respiratory system | negative | negative | Positive | negative | negative | negative |
| 318  | 1611 | Mbab0879 | M abscessus subsp bolletii  | 366 | GCA_900132765 | Respiratory system | negative | negative | Positive | Positive | negative | negative |
|      |      |          |                             |     |               |                    |          |          |          |          |          |          |
| #N/A | 700  | Mbaa0001 | M abscessus subsp abscessus | 1   | GCA_900139315 | Respiratory system | Positive | Positive | negative | negative | negative | negative |
| #N/A | 986  | Mbaa0002 | M abscessus subsp abscessus | 2   | GCA_002802325 | sputum             | Positive | Positive | negative | negative | negative | negative |
| #N/A | 1023 | Mbaa0004 | M abscessus subsp abscessus | 3   | GCA_002802815 | sputum             | Positive | Positive | negative | negative | negative | negative |
| #N/A | 839  | Mbaa0005 | M abscessus subsp abscessus | 4   | GCA_900139405 | Respiratory system | Positive | Positive | negative | negative | negative | negative |
| #N/A | 435  | Mbaa0006 | M abscessus subsp abscessus | 5   | GCA_900139465 | Respiratory system | Positive | Positive | negative | negative | negative | negative |
| #N/A | 699  | Mbaa0007 | M abscessus subsp abscessus | 7   | GCA_900139455 | Respiratory system | Positive | Positive | negative | negative | negative | negative |
| #N/A | 91   | Mbaa0008 | M abscessus subsp abscessus | 8   | GCA_900139425 | Respiratory system | Positive | Positive | negative | negative | negative | negative |
| #N/A | 196  | Mbaa0009 | M abscessus subsp abscessus | 9   | GCA_002802255 | lavage fluid       | Positive | Positive | negative | negative | negative | negative |
| #N/A | 705  | Mbaa0010 | M abscessus subsp abscessus | 9   | GCA_900139495 | Respiratory system | Positive | Positive | negative | negative | negative | negative |
| #N/A | 56   | Mbaa0011 | M abscessus subsp abscessus | 10  | GCA_900139345 | Respiratory system | Positive | Positive | negative | negative | negative | negative |
| #N/A | 749  | Mbaa0012 | M abscessus subsp abscessus | 11  | GCA_900139325 | Respiratory system | Positive | Positive | negative | negative | negative | negative |
| #N/A | 351  | Mbaa0013 | M abscessus subsp abscessus | 13  | GCA_900139365 | Respiratory system | Positive | Positive | negative | negative | negative | negative |
| #N/A | 974  | Mbaa0014 | M abscessus subsp abscessus | 14  | GCA_002801565 | sputum             | negative | Positive | negative | negative | negative | negative |
| #N/A | 251  | Mbaa0015 | M abscessus subsp abscessus | 14  | GCA_900139335 | Respiratory system | Positive | Positive | negative | negative | negative | negative |
| #N/A | 836  | Mbaa0016 | M abscessus subsp abscessus | 15  | GCA_900139375 | Respiratory system | Positive | Positive | negative | negative | negative | negative |
| #N/A | 95   | Mbaa0018 | M abscessus subsp abscessus | 18  | GCA_900139415 | Respiratory system | Positive | Positive | negative | negative | negative | negative |
| #N/A | 754  | Mbaa0022 | M abscessus subsp abscessus | 21  | GCA_900135185 | Respiratory system | Positive | Positive | negative | negative | negative | negative |
| #N/A | 745  | Mbaa0024 | M abscessus subsp abscessus | 22  | GCA_900135135 | Respiratory system | Positive | Positive | negative | negative | negative | negative |
| #N/A | 668  | Mbaa0025 | M abscessus subsp abscessus | 23  | GCA_900135125 | Respiratory system | Positive | Positive | negative | negative | negative | negative |
| #N/A | 957  | Mbaa0026 | M abscessus subsp abscessus | 24  | GCA_002801695 | sputum             | Positive | Positive | negative | negative | negative | negative |
| #N/A | 418  | Mbaa0027 | M abscessus subsp abscessus | 24  | GCA_900135145 | Respiratory system | Positive | Positive | negative | negative | negative | negative |
| #N/A | 497  | Mbaa0028 | M abscessus subsp abscessus | 25  | GCA_900135195 | Respiratory system | Positive | Positive | negative | negative | negative | negative |
| #N/A | 964  | Mbaa0030 | M abscessus subsp abscessus | 28  | GCA_002801535 | sputum             | Positive | Positive | negative | negative | negative | negative |
| #N/A | 434  | Mbaa0031 | M abscessus subsp abscessus | 28  | GCA_900135215 | Respiratory system | negative | Positive | negative | negative | negative | negative |
| #N/A | 1012 | Mbaa0032 | M abscessus subsp abscessus | 29  | GCA_002802775 | lavage fluid       | Positive | Positive | negative | negative | negative | negative |
| #N/A | 416  | Mbaa0033 | M abscessus subsp abscessus | 30  | GCA_900136595 | Respiratory system | Positive | Positive | negative | negative | negative | negative |
| #N/A | 542  | Mbaa0034 | M abscessus subsp abscessus | 31  | GCA_900136625 | Respiratory system | Positive | Positive | negative | negative | negative | negative |
| #N/A | 420  | Mbaa0035 | M abscessus subsp abscessus | 32  | GCA_900136615 | Respiratory system | Positive | Positive | negative | negative | negative | negative |
| #N/A | 423  | Mbaa0036 | M abscessus subsp abscessus | 33  | GCA_900135205 | Respiratory system | Positive | Positive | negative | negative | negative | negative |
| #N/A | 421  | Mbaa0037 | M abscessus subsp abscessus | 34  | GCA_900135165 | Respiratory system | Positive | Positive | negative | negative | negative | negative |
| #N/A | 422  | Mbaa0038 | M abscessus subsp abscessus | 35  | GCA_900134095 | Respiratory system | Positive | Positive | negative | negative | negative | negative |
| #N/A | 675  | Mbaa0039 | M abscessus subsp abscessus | 38  | GCA_900135245 | Respiratory system | Positive | Positive | negative | negative | negative | negative |
| #N/A | 678  | Mbaa0040 | M abscessus subsp abscessus | 39  | GCA_900135265 | Respiratory system | Positive | Positive | negative | negative | negative | negative |
| #N/A | 823  | Mbaa0042 | M abscessus subsp abscessus | 41  | GCA_900135275 | Respiratory system | Positive | Positive | negative | negative | negative | negative |
| #N/A | 409  | Mbaa0043 | M abscessus subsp abscessus | 43  | GCA_900135295 | Respiratory system | Positive | Positive | negative | negative | negative | negative |
| #N/A | 406  | Mbaa0045 | M abscessus subsp abscessus | 45  | GCA_900135315 | Respiratory system | Positive | Positive | negative | negative | negative | negative |
| #N/A | 127  | Mbaa0046 | M abscessus subsp abscessus | 46  | GCA_900135325 | Respiratory system | Positive | Positive | negative | negative | negative | negative |
| #N/A | 128  | Mbaa0047 | M abscessus subsp abscessus | 47  | GCA_900135335 | Respiratory system | Positive | Positive | negative | negative | negative | negative |
| #N/A | 129  | Mbaa0048 | M abscessus subsp abscessus | 49  | GCA_900135355 | Respiratory system | Positive | Positive | negative | negative | negative | negative |
| #N/A | 130  | Mbaa0049 | M abscessus subsp abscessus | 50  | GCA_900135365 | Respiratory system | Positive | Positive | negative | negative | negative | negative |
| #N/A | 131  | Mbaa0050 | M abscessus subsp abscessus | 51  | GCA_900135345 | Respiratory system | Positive | Positive | negative | negative | negative | negative |
| #N/A | 132  | Mbaa0051 | M abscessus subsp abscessus | 52  | GCA_900134085 | Respiratory system | Positive | Positive | negative | negative | negative | negative |
| #N/A | 157  | Mbaa0052 | M abscessus subsp abscessus | 53  | GCA_900134115 | Respiratory system | Positive | Positive | negative | negative | negative | negative |
| #N/A | 148  | Mbaa0053 | M abscessus subsp abscessus | 54  | GCA_900135375 | Respiratory system | Positive | Positive | negative | negative | negative | negative |
| #N/A | 149  | Mbaa0054 | M abscessus subsp abscessus | 55  | GCA_900135385 | Respiratory system | Positive | Positive | negative | negative | negative | negative |
| #N/A | 133  | Mbaa0055 | M abscessus subsp abscessus | 56  | GCA_900135395 | Respiratory system | Positive | Positive | negative | negative | negative | negative |
| #N/A | 998  | Mbaa0056 | M abscessus subsp abscessus | 57  | GCA_002801405 | sputum             | Positive | Positive | negative | negative | negative | negative |
| #N/A | 574  | Mbaa0057 | M abscessus subsp abscessus | 61  | GCA_900135435 | Respiratory system | Positive | Positive | negative | negative | negative | negative |
| #N/A | 177  | Mbaa0058 | M abscessus subsp abscessus | 62  | GCA_900135415 | Respiratory system | Positive | Positive | negative | negative | negative | negative |

























Akwnani et al., Supplementary Table.

|      |      |          |                             |      |               |                    |          |          |          |          |          |          |
|------|------|----------|-----------------------------|------|---------------|--------------------|----------|----------|----------|----------|----------|----------|
| #N/A | 606  | Mbaa0738 | M abscessus subsp abscessus | 1165 | GCA_900137175 | Respiratory system | Positive | Positive | negative | negative | negative | negative |
| #N/A | 513  | Mbaa0739 | M abscessus subsp abscessus | 1169 | GCA_900137145 | Respiratory system | Positive | Positive | negative | negative | negative | negative |
| #N/A | 511  | Mbaa0740 | M abscessus subsp abscessus | 1170 | GCA_900137165 | Respiratory system | Positive | Positive | negative | negative | negative | negative |
| #N/A | 512  | Mbaa0741 | M abscessus subsp abscessus | 1171 | GCA_900137155 | Respiratory system | Positive | Positive | negative | negative | negative | negative |
| #N/A | 961  | Mbaa0742 | M abscessus subsp abscessus | 1557 | GCA_002801495 | sputum             | Positive | Positive | negative | negative | negative | negative |
| #N/A | 321  | Mbaa0743 | M abscessus subsp abscessus | 1579 | GCA_002801945 | sputum             | Positive | Positive | negative | negative | negative | negative |
| #N/A | 1013 | Mbaa0744 | M abscessus subsp abscessus | 1701 | GCA_002802725 | lavage fluid       | Positive | Positive | negative | negative | negative | negative |
| #N/A | 71   | Mbaa0747 | M abscessus subsp abscessus | 2022 | GCA_002800705 | sputum             | Positive | Positive | negative | negative | negative | negative |
| #N/A | 327  | Mbaa0748 | M abscessus subsp abscessus | 2272 | GCA_002800345 | sputum             | Positive | Positive | negative | negative | negative | negative |
| #N/A | 959  | Mbaa0749 | M abscessus subsp abscessus | 2425 | GCA_002802735 | sputum             | Positive | Positive | negative | negative | negative | negative |
| #N/A | 967  | Mbaa0751 | M abscessus subsp abscessus | 2833 | GCA_002802385 | sputum             | Positive | Positive | negative | negative | negative | negative |
| #N/A | 860  | Mbaa0752 | M abscessus subsp abscessus | 2940 | GCA_002800685 | lavage fluid       | Positive | Positive | negative | negative | negative | negative |
| #N/A | 1005 | Mbaa0753 | M abscessus subsp abscessus | 2950 | GCA_002801665 | sputum             | Positive | Positive | negative | negative | negative | negative |
| #N/A | 325  | Mbaa0754 | M abscessus subsp abscessus | 3374 | GCA_002800305 | lavage fluid       | Positive | Positive | negative | negative | negative | negative |
| #N/A | 989  | Mbaa0757 | M abscessus subsp abscessus | 3478 | GCA_002800925 | sputum             | Positive | Positive | negative | negative | negative | negative |
| #N/A | 585  | Mbaa0759 | M abscessus subsp abscessus | 3671 | GCA_002802285 | sputum             | Positive | Positive | negative | negative | negative | negative |
| #N/A | 955  | Mbaa0760 | M abscessus subsp abscessus | 3739 | GCA_002801645 | lavage fluid       | Positive | Positive | negative | negative | negative | negative |
| #N/A | 501  | Mbaa0761 | M abscessus subsp abscessus | 3820 | GCA_002801175 | lavage fluid       | Positive | Positive | negative | negative | negative | negative |
| #N/A | 894  | Mbaa0762 | M abscessus subsp abscessus | 3998 | GCA_002801205 | lavage fluid       | Positive | Positive | negative | negative | negative | negative |
| #N/A | 450  | Mbaa0763 | M abscessus subsp abscessus | 4542 | GCA_002802345 | lavage fluid       | Positive | Positive | negative | negative | negative | negative |
| #N/A | 581  | Mbaa0764 | M abscessus subsp abscessus | 4883 | GCA_002800845 | sputum             | Positive | Positive | negative | negative | negative | negative |
| #N/A | 582  | Mbaa0765 | M abscessus subsp abscessus | 4886 | GCA_002800815 | sputum             | Positive | Positive | negative | negative | negative | negative |
| #N/A | 643  | Mbaa0766 | M abscessus subsp abscessus | 5295 | GCA_002801275 | sputum             | Positive | Positive | negative | negative | negative | negative |
| #N/A | 1010 | Mbaa0767 | M abscessus subsp abscessus | 5465 | GCA_002801365 | lavage fluid       | Positive | Positive | negative | negative | negative | negative |
| #N/A | 940  | Mbaa0768 | M abscessus subsp abscessus | 5589 | GCA_002801265 | sputum             | Positive | Positive | negative | negative | negative | negative |
| #N/A | 965  | Mbaa0769 | M abscessus subsp abscessus | 5681 | GCA_002801485 | sputum             | Positive | Positive | negative | negative | negative | negative |
| #N/A | 261  | Mbaa0770 | M abscessus subsp abscessus | 5696 | GCA_002802165 | lavage fluid       | Positive | Positive | negative | negative | negative | negative |
| #N/A | 979  | Mbaa0772 | M abscessus subsp abscessus | 5864 | GCA_002802595 | lavage fluid       | Positive | Positive | negative | negative | negative | negative |
| #N/A | 951  | Mbaa0773 | M abscessus subsp abscessus | 6010 | GCA_002801605 | sputum             | Positive | Positive | negative | negative | negative | negative |
| #N/A | 970  | Mbaa0774 | M abscessus subsp abscessus | 6094 | GCA_002800885 | lavage fluid       | Positive | Positive | negative | negative | negative | negative |
| #N/A | 199  | Mbaa0776 | M abscessus subsp abscessus | 6449 | GCA_002802135 | lavage fluid       | Positive | Positive | negative | negative | negative | negative |
| #N/A | 863  | Mbaa0778 | M abscessus subsp abscessus | A137 | GCA_002802075 | sputum             | Positive | Positive | negative | negative | negative | negative |
| #N/A | 900  | Mbaa0780 | M abscessus subsp abscessus | A176 | GCA_002801005 | lavage fluid       | Positive | Positive | negative | negative | negative | negative |
| #N/A | 549  | Mbaa0785 | M abscessus subsp abscessus | A206 | GCA_002800555 | lavage fluid       | Positive | Positive | negative | negative | negative | negative |
| #N/A | 600  | Mbaa0788 | M abscessus subsp abscessus | A217 | GCA_002802225 | sputum             | Positive | Positive | negative | negative | negative | negative |
| #N/A | 966  | Mbaa0790 | M abscessus subsp abscessus | A229 | GCA_002801465 | sputum             | Positive | negative | negative | negative | negative | negative |
| #N/A | 904  | Mbaa0792 | M abscessus subsp abscessus | A233 | GCA_002802565 | lavage fluid       | Positive | Positive | negative | negative | negative | negative |
| #N/A | 273  | Mbaa0795 | M abscessus subsp abscessus | A249 | GCA_002800525 | sputum             | Positive | Positive | negative | negative | negative | negative |
| #N/A | 77   | Mbaa0798 | M abscessus subsp abscessus | A266 | GCA_002800495 | sputum             | Positive | Positive | negative | negative | negative | negative |
| #N/A | 652  | Mbaa0801 | M abscessus subsp abscessus | A305 | GCA_002801085 | sputum             | Positive | Positive | negative | negative | negative | negative |
| #N/A | 451  | Mbaa0802 | M abscessus subsp abscessus | A309 | GCA_002802065 | sputum             | Positive | Positive | negative | negative | negative | negative |
| #N/A | 853  | Mbaa0803 | M abscessus subsp abscessus | A311 | GCA_002800485 | lavage fluid       | Positive | Positive | negative | negative | negative | negative |
| #N/A | 65   | Mbaa0804 | M abscessus subsp abscessus | A312 | GCA_002800465 | lavage fluid       | Positive | Positive | negative | negative | negative | negative |
| #N/A | 878  | Mbaa0806 | M abscessus subsp abscessus | A317 | GCA_002801065 | lavage fluid       | Positive | Positive | negative | negative | negative | negative |
| #N/A | 889  | Mbaa0808 | M abscessus subsp abscessus | A324 | GCA_002801025 | sputum             | negative | Positive | negative | negative | negative | negative |
| #N/A | 74   | Mbaa0813 | M abscessus subsp abscessus | A350 | GCA_002800445 | sputum             | Positive | Positive | negative | negative | negative | negative |
| #N/A | 79   | Mbaa0818 | M abscessus subsp abscessus | A38  | GCA_002800665 | sputum             | Positive | Positive | negative | negative | negative | negative |
| #N/A | 944  | Mbaa0819 | M abscessus subsp abscessus | A395 | GCA_002802805 | lavage fluid       | Positive | Positive | negative | negative | negative | negative |
| #N/A | 982  | Mbaa0820 | M abscessus subsp abscessus | A40  | GCA_002802425 | lavage fluid       | Positive | Positive | negative | negative | negative | negative |
| #N/A | 892  | Mbaa0821 | M abscessus subsp abscessus | A426 | GCA_002802515 | sputum             | Positive | Positive | negative | negative | negative | negative |
| #N/A | 198  | Mbaa0822 | M abscessus subsp abscessus | A467 | GCA_002800405 | sputum             | Positive | Positive | negative | negative | negative | negative |
| #N/A | 1019 | Mbaa0824 | M abscessus subsp abscessus | A478 | GCA_002802505 | sputum             | Positive | Positive | negative | negative | negative | negative |
| #N/A | 274  | Mbaa0825 | M abscessus subsp abscessus | A482 | GCA_002802025 | lavage fluid       | Positive | Positive | negative | negative | negative | negative |

Akwni et al., Supplementary Table.

|      |     |          |                             |            |               |                        |          |          |          |          |          |          |
|------|-----|----------|-----------------------------|------------|---------------|------------------------|----------|----------|----------|----------|----------|----------|
| #N/A | 557 | Mbaa0826 | M abscessus subsp abscessus | A49        | GCA_002802405 | lavage fluid           | Positive | Positive | negative | negative | negative | negative |
| #N/A | 67  | Mbaa0827 | M abscessus subsp abscessus | A51        | GCA_002800625 | sputum                 | Positive | Positive | negative | negative | negative | negative |
| #N/A | 275 | Mbaa0829 | M abscessus subsp abscessus | A58        | GCA_002802145 | sputum                 | Positive | Positive | negative | negative | negative | negative |
| #N/A | 846 | Mbaa0832 | M abscessus subsp abscessus | A73        | GCA_002800615 | sputum                 | Positive | Positive | negative | negative | negative | negative |
| #N/A | 96  | Mbaa0833 | M abscessus subsp abscessus | A79        | GCA_002802055 | sputum                 | Positive | Positive | negative | negative | negative | negative |
| #N/A | 403 | Mbaa0834 | M abscessus subsp abscessus | A8         | GCA_002800165 | sputum                 | Positive | Positive | negative | negative | negative | negative |
| #N/A | 197 | Mbaa0844 | M abscessus subsp bolletii  | 103        | GCA_000524075 | sputum                 | Positive | Positive | negative | negative | negative | negative |
| #N/A | 539 | Mbaa0847 | M abscessus subsp bolletii  | 137        | GCA_001792645 | respiratory            | Positive | Positive | negative | negative | negative | negative |
| #N/A | 954 | Mbaa1308 | M abscessus                 | 199        | GCA_003076835 | Not available          | Positive | Positive | negative | negative | negative | negative |
| #N/A | 485 | Mbaa1312 | M abscessus                 | 9808       | GCA_000332605 | wound exudate          | Positive | Positive | negative | negative | negative | negative |
| #N/A | 213 | Mbaa1313 | M abscessus                 | 3A-0119-R  | GCA_000270825 | sputum                 | Positive | Positive | negative | negative | negative | negative |
| #N/A | 215 | Mbaa1315 | M abscessus                 | 3A-0122-S  | GCA_000270585 | sputum                 | Positive | Positive | negative | negative | negative | negative |
| #N/A | 217 | Mbaa1316 | M abscessus                 | 3A-0731    | GCA_000270705 | sputum                 | Positive | Positive | negative | negative | negative | negative |
| #N/A | 214 | Mbaa1318 | M abscessus                 | 3A-0930-R  | GCA_000270565 | sputum                 | Positive | Positive | negative | negative | negative | negative |
| #N/A | 216 | Mbaa1319 | M abscessus                 | 3A-0930-S  | GCA_000270725 | sputum                 | Positive | Positive | negative | negative | negative | negative |
| #N/A | 655 | Mbaa1322 | M abscessus                 | 4S-0116-S  | GCA_000270625 | sputum                 | Positive | Positive | negative | negative | negative | negative |
| #N/A | 659 | Mbaa1323 | M abscessus                 | 4S-0206    | GCA_000270745 | sputum                 | Positive | Positive | negative | negative | negative | negative |
| #N/A | 657 | Mbaa1324 | M abscessus                 | 4S-0303    | GCA_000271125 | sputum                 | Positive | Positive | negative | negative | negative | negative |
| #N/A | 656 | Mbaa1325 | M abscessus                 | 4S-0726-RA | GCA_000271245 | sputum                 | Positive | Positive | negative | negative | negative | negative |
| #N/A | 210 | Mbaa1335 | M abscessus                 | 6G-0125-R  | GCA_000270985 | sputum                 | Positive | Positive | negative | negative | negative | negative |
| #N/A | 211 | Mbaa1336 | M abscessus                 | 6G-0125-S  | GCA_000270865 | sputum                 | Positive | Positive | negative | negative | negative | negative |
| #N/A | 212 | Mbaa1339 | M abscessus                 | 6G-0728-S  | GCA_000271185 | sputum                 | Positive | Positive | negative | negative | negative | negative |
| #N/A | 595 | Mbaa1342 | M abscessus                 | A137       | GCA_003071695 | sputum                 | Positive | Positive | negative | negative | negative | negative |
| #N/A | 279 | Mbaa1344 | M abscessus                 | A247       | GCA_003071935 | sputum                 | Positive | Positive | negative | negative | negative | negative |
| #N/A | 145 | Mbaa1345 | M abscessus                 | A254       | GCA_003072325 | Bronchoalveolar lavage | Positive | Positive | negative | negative | negative | negative |
| #N/A | 76  | Mbaa1346 | M abscessus                 | A305       | GCA_003072425 | sputum                 | Positive | Positive | negative | negative | negative | negative |
| #N/A | 308 | Mbaa1347 | M abscessus                 | A315       | GCA_003072385 | sputum                 | Positive | Positive | negative | negative | negative | negative |
| #N/A | 550 | Mbaa1348 | M abscessus                 | A321       | GCA_003072405 | sputum                 | Positive | Positive | negative | negative | negative | negative |
| #N/A | 73  | Mbaa1349 | M abscessus                 | A73        | GCA_003071685 | Bronchoalveolar lavage | Positive | Positive | negative | negative | negative | negative |
| #N/A | 569 | Mbaa1350 | M abscessus                 | CF         | GCA_000333695 | Not available          | Positive | Positive | negative | negative | negative | negative |
| #N/A | 786 | Mbaa1351 | M abscessus                 | CF34-14-1  | GCA_004010025 | Homo sapiens           | Positive | Positive | negative | negative | negative | negative |
| #N/A | 66  | Mbaa1360 | M abscessus                 | FLAC014    | GCA_002142865 | Homo sapiens           | Positive | Positive | negative | negative | negative | negative |
| #N/A | 117 | Mbaa1368 | M abscessus                 | FLAC046    | GCA_001677195 | Homo sapiens           | Positive | Positive | negative | negative | negative | negative |
| #N/A | 118 | Mbaa1374 | M abscessus                 | FLAC053    | GCA_002142775 | Homo sapiens           | Positive | Positive | negative | negative | negative | negative |
| #N/A | 901 | Mbaa1378 | M abscessus                 | G102       | GCA_003583085 | sputum                 | Positive | Positive | negative | negative | negative | negative |
| #N/A | 950 | Mbaa1379 | M abscessus                 | G104       | GCA_003583065 | sputum                 | Positive | Positive | negative | negative | negative | negative |
| #N/A | 316 | Mbaa1381 | M abscessus                 | G106       | GCA_003583025 | sputum                 | Positive | negative | negative | negative | negative | negative |
| #N/A | 537 | Mbaa1383 | M abscessus                 | G108       | GCA_003582985 | Bronchoalveolar lavage | Positive | Positive | negative | negative | negative | negative |
| #N/A | 949 | Mbaa1384 | M abscessus                 | G109       | GCA_003582965 | sputum                 | Positive | Positive | negative | negative | negative | negative |
| #N/A | 867 | Mbaa1386 | M abscessus                 | G111       | GCA_003582905 | sputum                 | Positive | Positive | negative | negative | negative | negative |
| #N/A | 973 | Mbaa1387 | M abscessus                 | G112       | GCA_003072285 | sputum                 | Positive | Positive | negative | negative | negative | negative |
| #N/A | 570 | Mbaa1388 | M abscessus                 | G113       | GCA_003582895 | sputum                 | Positive | Positive | negative | negative | negative | negative |
| #N/A | 314 | Mbaa1389 | M abscessus                 | G114       | GCA_003072235 | Bronchoalveolar lavage | Positive | negative | negative | negative | negative | negative |
| #N/A | 910 | Mbaa1390 | M abscessus                 | G115       | GCA_003582885 | Bronchoalveolar lavage | Positive | Positive | negative | negative | negative | negative |
| #N/A | 278 | Mbaa1392 | M abscessus                 | G119       | GCA_003071865 | sputum                 | Positive | Positive | negative | negative | negative | negative |
| #N/A | 587 | Mbaa1393 | M abscessus                 | G120       | GCA_003582845 | sputum                 | Positive | Positive | negative | negative | negative | negative |
| #N/A | 592 | Mbaa1394 | M abscessus                 | G121       | GCA_003582825 | Bronchoalveolar lavage | Positive | Positive | negative | negative | negative | negative |
| #N/A | 864 | Mbaa1395 | M abscessus                 | G122       | GCA_003076815 | Not available          | Positive | Positive | negative | negative | negative | negative |
| #N/A | 280 | Mbaa1396 | M abscessus                 | G123       | GCA_003582795 | sputum                 | Positive | Positive | negative | negative | negative | negative |
| #N/A | 601 | Mbaa1398 | M abscessus                 | G125       | GCA_003582765 | sputum                 | Positive | Positive | negative | negative | negative | negative |
| #N/A | 995 | Mbaa1400 | M abscessus                 | G127       | GCA_003581705 | sputum                 | Positive | Positive | negative | negative | negative | negative |
| #N/A | 902 | Mbaa1401 | M abscessus                 | G128       | GCA_003582715 | sputum                 | Positive | Positive | negative | negative | negative | negative |
| #N/A | 644 | Mbaa1402 | M abscessus                 | G133       | GCA_003582705 | sputum                 | Positive | Positive | negative | negative | negative | negative |

Akwani et al., Supplementary Table.

|      |      |          |             |      |               |                        |          |          |          |          |          |          |
|------|------|----------|-------------|------|---------------|------------------------|----------|----------|----------|----------|----------|----------|
| #N/A | 322  | Mbaa1403 | M abscessus | G134 | GCA_003582685 | sputum                 | Positive | Positive | negative | negative | negative | negative |
| #N/A | 876  | Mbaa1406 | M abscessus | G139 | GCA_003582625 | Bronchoalveolar lavage | Positive | Positive | negative | negative | negative | negative |
| #N/A | 877  | Mbaa1407 | M abscessus | G140 | GCA_003582605 | sputum                 | Positive | Positive | negative | negative | negative | negative |
| #N/A | 323  | Mbaa1409 | M abscessus | G142 | GCA_003582575 | Bronchoalveolar lavage | Positive | Positive | negative | negative | negative | negative |
| #N/A | 945  | Mbaa1410 | M abscessus | G143 | GCA_003582565 | sputum                 | Positive | Positive | negative | negative | negative | negative |
| #N/A | 890  | Mbaa1411 | M abscessus | G146 | GCA_003582545 | Bronchoalveolar lavage | Positive | Positive | negative | negative | negative | negative |
| #N/A | 510  | Mbaa1413 | M abscessus | G148 | GCA_003071765 | Bronchoalveolar lavage | Positive | Positive | negative | negative | negative | negative |
| #N/A | 847  | Mbaa1414 | M abscessus | G149 | GCA_003582525 | sputum                 | Positive | Positive | negative | negative | Positive | negative |
| #N/A | 223  | Mbaa1415 | M abscessus | G152 | GCA_003071825 | sputum                 | Positive | Positive | negative | negative | negative | negative |
| #N/A | 893  | Mbaa1417 | M abscessus | G155 | GCA_003582485 | sputum                 | Positive | Positive | negative | negative | negative | negative |
| #N/A | 75   | Mbaa1419 | M abscessus | G158 | GCA_003582445 | sputum                 | Positive | Positive | negative | negative | negative | negative |
| #N/A | 993  | Mbaa1420 | M abscessus | G159 | GCA_003581665 | sputum                 | Positive | Positive | negative | negative | negative | negative |
| #N/A | 441  | Mbaa1422 | M abscessus | G161 | GCA_003072225 | sputum                 | Positive | Positive | negative | negative | negative | negative |
| #N/A | 994  | Mbaa1423 | M abscessus | G162 | GCA_003071805 | sputum                 | Positive | Positive | negative | negative | negative | negative |
| #N/A | 991  | Mbaa1425 | M abscessus | G169 | GCA_003582405 | sputum                 | Positive | Positive | negative | negative | negative | negative |
| #N/A | 315  | Mbaa1426 | M abscessus | G170 | GCA_003071745 | sputum                 | Positive | negative | negative | negative | negative | negative |
| #N/A | 387  | Mbaa1428 | M abscessus | G174 | GCA_003582365 | sputum                 | Positive | Positive | negative | negative | negative | negative |
| #N/A | 971  | Mbaa1429 | M abscessus | G176 | GCA_003582345 | sputum                 | Positive | Positive | negative | negative | negative | negative |
| #N/A | 976  | Mbaa1430 | M abscessus | G177 | GCA_003582325 | Bronchoalveolar lavage | Positive | Positive | negative | negative | negative | negative |
| #N/A | 947  | Mbaa1431 | M abscessus | G178 | GCA_003582295 | sputum                 | Positive | Positive | negative | negative | negative | negative |
| #N/A | 324  | Mbaa1432 | M abscessus | G179 | GCA_003582285 | sputum                 | Positive | Positive | negative | negative | negative | negative |
| #N/A | 972  | Mbaa1433 | M abscessus | G180 | GCA_003582265 | Bronchoalveolar lavage | Positive | Positive | negative | negative | negative | negative |
| #N/A | 311  | Mbaa1434 | M abscessus | G181 | GCA_003582235 | Bronchoalveolar lavage | Positive | negative | negative | negative | negative | negative |
| #N/A | 948  | Mbaa1435 | M abscessus | G182 | GCA_003072205 | sputum                 | Positive | Positive | negative | negative | negative | negative |
| #N/A | 891  | Mbaa1436 | M abscessus | G184 | GCA_003582225 | sputum                 | Positive | Positive | negative | negative | negative | negative |
| #N/A | 384  | Mbaa1437 | M abscessus | G185 | GCA_003582205 | sputum                 | Positive | Positive | negative | negative | negative | negative |
| #N/A | 593  | Mbaa1440 | M abscessus | G192 | GCA_003582145 | sputum                 | Positive | Positive | negative | negative | negative | negative |
| #N/A | 999  | Mbaa1441 | M abscessus | G193 | GCA_003582115 | sputum                 | Positive | Positive | negative | negative | negative | negative |
| #N/A | 313  | Mbaa1442 | M abscessus | G194 | GCA_003582105 | sputum                 | Positive | negative | negative | negative | negative | negative |
| #N/A | 312  | Mbaa1443 | M abscessus | G195 | GCA_003582075 | sputum                 | Positive | negative | negative | negative | negative | negative |
| #N/A | 442  | Mbaa1444 | M abscessus | G197 | GCA_003582055 | sputum                 | Positive | Positive | negative | negative | negative | negative |
| #N/A | 962  | Mbaa1445 | M abscessus | G198 | GCA_003582045 | sputum                 | Positive | Positive | negative | negative | negative | negative |
| #N/A | 319  | Mbaa1446 | M abscessus | G200 | GCA_003582025 | sputum                 | Positive | negative | negative | negative | negative | negative |
| #N/A | 956  | Mbaa1449 | M abscessus | G204 | GCA_003581985 | Bronchoalveolar lavage | Positive | Positive | negative | negative | negative | negative |
| #N/A | 968  | Mbaa1450 | M abscessus | G205 | GCA_003581945 | sputum                 | Positive | Positive | negative | negative | negative | negative |
| #N/A | 309  | Mbaa1452 | M abscessus | G208 | GCA_003581935 | sputum                 | Positive | Positive | negative | negative | negative | negative |
| #N/A | 594  | Mbaa1453 | M abscessus | G213 | GCA_003581675 | sputum                 | Positive | Positive | negative | negative | negative | negative |
| #N/A | 871  | Mbaa1454 | M abscessus | G215 | GCA_003581925 | sputum                 | Positive | Positive | negative | negative | negative | negative |
| #N/A | 879  | Mbaa1455 | M abscessus | G216 | GCA_003581895 | sputum                 | Positive | Positive | negative | negative | negative | negative |
| #N/A | 1004 | Mbaa1456 | M abscessus | G218 | GCA_003071785 | sputum                 | Positive | Positive | negative | negative | negative | negative |
| #N/A | 952  | Mbaa1457 | M abscessus | G219 | GCA_003072145 | sputum                 | Positive | Positive | negative | negative | negative | negative |
| #N/A | 841  | Mbaa1459 | M abscessus | G70  | GCA_003581885 | sputum                 | Positive | Positive | negative | negative | negative | negative |
| #N/A | 895  | Mbaa1460 | M abscessus | G72  | GCA_003581865 | sputum                 | Positive | Positive | negative | negative | negative | negative |
| #N/A | 946  | Mbaa1461 | M abscessus | G73  | GCA_003581845 | sputum                 | Positive | Positive | negative | negative | negative | negative |
| #N/A | 896  | Mbaa1463 | M abscessus | G76  | GCA_003581805 | sputum                 | Positive | Positive | negative | negative | negative | negative |
| #N/A | 276  | Mbaa1465 | M abscessus | G82  | GCA_003581785 | sputum                 | Positive | Positive | negative | negative | negative | negative |
| #N/A | 1009 | Mbaa1466 | M abscessus | G84  | GCA_003581765 | sputum                 | Positive | Positive | negative | negative | negative | negative |
| #N/A | 68   | Mbaa1468 | M abscessus | G86  | GCA_003581735 | sputum                 | Positive | Positive | negative | negative | negative | negative |
| #N/A | 903  | Mbaa1470 | M abscessus | G89  | GCA_003581725 | sputum                 | Positive | Positive | negative | negative | negative | negative |
| #N/A | 963  | Mbaa1471 | M abscessus | G90  | GCA_003580165 | sputum                 | Positive | Positive | negative | negative | negative | negative |
| #N/A | 953  | Mbaa1472 | M abscessus | G91  | GCA_003071975 | Bronchoalveolar lavage | Positive | Positive | negative | negative | negative | negative |
| #N/A | 591  | Mbaa1473 | M abscessus | G94  | GCA_003071845 | sputum                 | Positive | Positive | negative | negative | negative | negative |
| #N/A | 584  | Mbaa1475 | M abscessus | G99  | GCA_003580125 | sputum                 | Positive | Positive | negative | negative | negative | negative |

Akwani et al., Supplementary Table.

|      |      |          |                            |                 |               |                        |          |          |          |          |          |          |
|------|------|----------|----------------------------|-----------------|---------------|------------------------|----------|----------|----------|----------|----------|----------|
| #N/A | 1017 | Mbaa1491 | M abscessus                | MAB_030201_1075 | GCA_000523575 | bronchoalveolar lavage | Positive | Positive | negative | negative | negative | negative |
| #N/A | 1015 | Mbaa1496 | M abscessus                | MAB_110811_1470 | GCA_000523955 | sputum                 | Positive | Positive | negative | negative | negative | negative |
| #N/A | 83   | Mbaa1500 | M abscessus                | NOV0213         | GCA_001430775 | sputum                 | Positive | Positive | negative | negative | negative | negative |
| #N/A | 110  | Mbaa1501 | M abscessus                | PAP001          | GCA_001213205 | sputum                 | Positive | Positive | negative | negative | negative | negative |
| #N/A | 109  | Mbaa1502 | M abscessus                | PAP002          | GCA_001212845 | sputum                 | Positive | Positive | negative | negative | negative | negative |
| #N/A | 686  | Mbaa1506 | M abscessus                | PAP008          | GCA_001213945 | sputum                 | Positive | Positive | negative | negative | negative | negative |
| #N/A | 554  | Mbaa1508 | M abscessus                | PAP010          | GCA_001212985 | sputum                 | Positive | Positive | negative | negative | negative | negative |
| #N/A | 801  | Mbaa1509 | M abscessus                | PAP011          | GCA_001213725 | sputum                 | Positive | Positive | negative | negative | negative | negative |
| #N/A | 683  | Mbaa1510 | M abscessus                | PAP012          | GCA_001213385 | sputum                 | Positive | Positive | negative | negative | negative | negative |
| #N/A | 802  | Mbaa1517 | M abscessus                | PAP019          | GCA_001214185 | sputum                 | Positive | Positive | negative | negative | negative | negative |
| #N/A | 111  | Mbaa1518 | M abscessus                | PAP020          | GCA_001213825 | sputum                 | Positive | Positive | negative | negative | negative | negative |
| #N/A | 555  | Mbaa1519 | M abscessus                | PAP022          | GCA_001213165 | sputum                 | Positive | Positive | negative | negative | negative | negative |
| #N/A | 798  | Mbaa1526 | M abscessus                | PAP029          | GCA_001212865 | sputum                 | Positive | Positive | negative | negative | negative | negative |
| #N/A | 796  | Mbaa1527 | M abscessus                | PAP030          | GCA_001213965 | sputum                 | Positive | Positive | negative | negative | negative | negative |
| #N/A | 684  | Mbaa1529 | M abscessus                | PAP032          | GCA_001213685 | sputum                 | Positive | Positive | negative | negative | negative | negative |
| #N/A | 419  | Mbaa1532 | M abscessus                | PAP036          | GCA_001213605 | sputum                 | Positive | Positive | negative | negative | negative | negative |
| #N/A | 414  | Mbaa1536 | M abscessus                | PAP040          | GCA_001213225 | sputum                 | Positive | Positive | negative | negative | negative | negative |
| #N/A | 417  | Mbaa1537 | M abscessus                | PAP041          | GCA_001213745 | sputum                 | Positive | Positive | negative | negative | negative | negative |
| #N/A | 800  | Mbaa1538 | M abscessus                | PAP042          | GCA_001212805 | sputum                 | Positive | Positive | negative | negative | negative | negative |
| #N/A | 803  | Mbaa1542 | M abscessus                | PAP046          | GCA_001214085 | sputum                 | Positive | Positive | negative | negative | negative | negative |
| #N/A | 797  | Mbaa1543 | M abscessus                | PAP047          | GCA_001213505 | sputum                 | Positive | Positive | negative | negative | negative | negative |
| #N/A | 814  | Mbaa1549 | M abscessus                | PAP054          | GCA_001215625 | sputum                 | Positive | Positive | negative | negative | negative | negative |
| #N/A | 804  | Mbaa1554 | M abscessus                | PAP060          | GCA_001212885 | sputum                 | Positive | Positive | negative | negative | negative | negative |
| #N/A | 768  | Mbaa1555 | M abscessus                | PAP062          | GCA_001213885 | sputum                 | Positive | Positive | negative | negative | negative | negative |
| #N/A | 793  | Mbaa1559 | M abscessus                | PAP067          | GCA_001213705 | sputum                 | Positive | Positive | negative | negative | negative | negative |
| #N/A | 791  | Mbaa1560 | M abscessus                | PAP068          | GCA_001213785 | sputum                 | Positive | Positive | negative | negative | negative | negative |
| #N/A | 819  | Mbaa1561 | M abscessus                | PAP069          | GCA_001213285 | sputum                 | Positive | Positive | negative | negative | negative | negative |
| #N/A | 794  | Mbaa1563 | M abscessus                | PAP071          | GCA_001214985 | sputum                 | Positive | Positive | negative | negative | negative | negative |
| #N/A | 748  | Mbaa1567 | M abscessus                | PAP075          | GCA_001215445 | sputum                 | Positive | Positive | negative | negative | negative | negative |
| #N/A | 415  | Mbaa1568 | M abscessus                | PAP076          | GCA_001215845 | sputum                 | Positive | Positive | negative | negative | negative | negative |
| #N/A | 108  | Mbaa1569 | M abscessus                | PAP077          | GCA_001215045 | sputum                 | Positive | Positive | negative | negative | negative | negative |
| #N/A | 685  | Mbaa1571 | M abscessus                | PAP079          | GCA_001217145 | sputum                 | Positive | Positive | negative | negative | negative | negative |
| #N/A | 413  | Mbaa1574 | M abscessus                | PAP082          | GCA_001215385 | sputum                 | Positive | Positive | negative | negative | negative | negative |
| #N/A | 792  | Mbaa1575 | M abscessus                | PAP083          | GCA_001216305 | sputum                 | Positive | Positive | negative | negative | negative | negative |
| #N/A | 405  | Mbaa1577 | M abscessus                | PAP085          | GCA_001214625 | sputum                 | Positive | Positive | negative | negative | negative | negative |
| #N/A | 873  | Mbaa1582 | M abscessus                | PAP090          | GCA_001217125 | sputum                 | Positive | Positive | negative | negative | negative | negative |
| #N/A | 815  | Mbaa1594 | M abscessus                | PAP102          | GCA_001215005 | sputum                 | Positive | Positive | negative | negative | negative | negative |
| #N/A | 813  | Mbaa1598 | M abscessus                | PAP106          | GCA_001215565 | sputum                 | Positive | Positive | negative | negative | negative | negative |
| #N/A | 439  | Mbaa1605 | M abscessus                | PAP113          | GCA_001216145 | sputum                 | Positive | Positive | negative | negative | negative | negative |
| #N/A | 426  | Mbaa1607 | M abscessus                | PAP115          | GCA_001215965 | sputum                 | Positive | Positive | negative | negative | negative | negative |
| #N/A | 440  | Mbaa1619 | M abscessus                | PAP127          | GCA_001350895 | sputum                 | Positive | Positive | negative | negative | negative | negative |
| #N/A | 805  | Mbaa1622 | M abscessus                | PAP130          | GCA_001217525 | sputum                 | Positive | Positive | negative | negative | negative | negative |
| #N/A | 799  | Mbaa1624 | M abscessus                | PAP132          | GCA_001215265 | sputum                 | Positive | Positive | negative | negative | negative | negative |
| #N/A | 816  | Mbaa1625 | M abscessus                | PAP133          | GCA_001214585 | sputum                 | Positive | Positive | negative | negative | negative | negative |
| #N/A | 556  | Mbaa1630 | M abscessus                | PAP138          | GCA_001216065 | sputum                 | Positive | Positive | negative | negative | negative | negative |
| #N/A | 558  | Mbaa1632 | M abscessus                | PAP140          | GCA_001215165 | sputum                 | Positive | Positive | negative | negative | negative | negative |
| #N/A | 817  | Mbaa1652 | M abscessus                | PAP161          | GCA_001214925 | sputum                 | Positive | Positive | negative | negative | negative | negative |
| #N/A | 822  | Mbaa1653 | M abscessus                | PAP163          | GCA_001217185 | sputum                 | Positive | Positive | negative | negative | negative | negative |
| #N/A | 427  | Mbaa1658 | M abscessus                | PAP170          | GCA_001215945 | sputum                 | Positive | Positive | negative | negative | negative | negative |
| #N/A | 158  | Mbaa1662 | M abscessus                | V06705          | GCA_000443145 | bronchoalveolar lavage | Positive | Positive | negative | negative | negative | negative |
| #N/A | 1585 | Mbab0841 | M abscessus subsp bolletii | 17              | GCA_900139385 | Respiratory system     | negative | Positive | Positive | Positive | negative | negative |
| #N/A | 1625 | Mbab0845 | M abscessus subsp bolletii | 107             | GCA_900136655 | Respiratory system     | negative | negative | Positive | Positive | negative | negative |
| #N/A | 1602 | Mbab0846 | M abscessus subsp bolletii | 135             | GCA_900139545 | Respiratory system     | negative | negative | Positive | Positive | negative | negative |





|      |      |          |                               |             |               |                           |          |          |          |          |          |          |
|------|------|----------|-------------------------------|-------------|---------------|---------------------------|----------|----------|----------|----------|----------|----------|
| #N/A | 1600 | Mbab0934 | M abscessus subsp bolletii    | 1056        | GCA_900137535 | Respiratory system        | negative | negative | Positive | Positive | negative | negative |
| #N/A | 1661 | Mbab0935 | M abscessus subsp bolletii    | 1107        | GCA_900141605 | Respiratory system        | negative | negative | Positive | Positive | negative | negative |
| #N/A | 1578 | Mbab0936 | M abscessus subsp bolletii    | 1128        | GCA_900137885 | Respiratory system        | negative | negative | Positive | Positive | negative | negative |
| #N/A | 1638 | Mbab1511 | M abscessus                   | PAP013      | GCA_001212905 | sputum                    | negative | negative | Positive | Positive | negative | negative |
| #N/A | 1626 | Mbab1512 | M abscessus                   | PAP014      | GCA_001213985 | sputum                    | negative | negative | Positive | Positive | negative | negative |
| #N/A | 1631 | Mbab1513 | M abscessus                   | PAP015      | GCA_001213305 | sputum                    | negative | negative | Positive | Positive | negative | negative |
| #N/A | 1627 | Mbab1530 | M abscessus                   | PAP033      | GCA_001213665 | sputum                    | negative | negative | Positive | Positive | negative | negative |
| #N/A | 1632 | Mbab1534 | M abscessus                   | PAP038      | GCA_001213445 | sputum                    | negative | negative | Positive | Positive | negative | negative |
| #N/A | 1630 | Mbab1540 | M abscessus                   | PAP044      | GCA_001213845 | sputum                    | negative | negative | Positive | Positive | negative | negative |
| #N/A | 1633 | Mbab1556 | M abscessus                   | PAP063      | GCA_001214065 | sputum                    | negative | negative | Positive | Positive | negative | negative |
| #N/A | 1634 | Mbab1557 | M abscessus                   | PAP064      | GCA_001214045 | sputum                    | negative | negative | Positive | Positive | negative | negative |
| #N/A | 1636 | Mbab1558 | M abscessus                   | PAP065      | GCA_001214105 | sputum                    | negative | negative | Positive | Positive | negative | negative |
| #N/A | 1608 | Mbab1591 | M abscessus                   | PAP099      | GCA_001216025 | sputum                    | negative | negative | Positive | Positive | negative | negative |
| #N/A | 1628 | Mbab1623 | M abscessus                   | PAP131      | GCA_001215465 | sputum                    | negative | negative | Positive | Positive | negative | negative |
| #N/A | 1635 | Mbab1631 | M abscessus                   | PAP139      | GCA_001216965 | sputum                    | negative | negative | Positive | Positive | negative | negative |
| #N/A | 1629 | Mbab1634 | M abscessus                   | PAP142      | GCA_001216265 | sputum                    | negative | negative | Positive | Positive | negative | negative |
| #N/A | 1637 | Mbab1651 | M abscessus                   | PAP160      | GCA_001214225 | sputum                    | negative | negative | Positive | Positive | negative | negative |
| #N/A | 1466 | Mbam0918 | M abscessus subsp bolletii    | 893         | GCA_900141415 | Respiratory system        | negative | negative | negative | negative | Positive | Positive |
| #N/A | 1302 | Mbam0939 | M abscessus subsp bolletii    | 1S-151-0930 | GCA_000271165 | bronchial alveolar lavage | negative | negative | negative | negative | Positive | Positive |
| #N/A | 1293 | Mbam0942 | M abscessus subsp bolletii    | 1S-154-0310 | GCA_000308015 | bronchial alveolar lavage | negative | negative | negative | negative | Positive | Positive |
| #N/A | 1191 | Mbam0946 | M abscessus subsp bolletii    | 2B-0912-R   | GCA_000270805 | sputum                    | negative | negative | negative | negative | Positive | Positive |
| #N/A | 1192 | Mbam0948 | M abscessus subsp bolletii    | 2B-1231     | GCA_000270925 | bronchial alveolar lavage | negative | negative | negative | negative | Positive | Positive |
| #N/A | 1311 | Mbam0958 | M abscessus subsp massiliense | 59          | GCA_002801925 | sputum                    | negative | negative | negative | negative | Positive | Positive |
| #N/A | 1546 | Mbam0962 | M abscessus subsp massiliense | 75          | GCA_900132825 | Respiratory system        | negative | negative | negative | negative | Positive | Positive |
| #N/A | 1091 | Mbam0963 | M abscessus subsp massiliense | 76          | GCA_900133475 | Respiratory system        | negative | negative | negative | negative | Positive | Positive |
| #N/A | 1446 | Mbam0964 | M abscessus subsp massiliense | 84          | GCA_900136635 | Respiratory system        | negative | negative | negative | negative | Positive | Positive |
| #N/A | 1361 | Mbam0965 | M abscessus subsp massiliense | 93          | GCA_900139645 | Respiratory system        | negative | negative | negative | negative | Positive | Positive |
| #N/A | 1362 | Mbam0967 | M abscessus subsp massiliense | 112         | GCA_900136725 | Respiratory system        | negative | negative | negative | negative | Positive | Positive |
| #N/A | 1363 | Mbam0968 | M abscessus subsp massiliense | 113         | GCA_900136715 | Respiratory system        | negative | negative | negative | negative | Positive | Positive |
| #N/A | 1354 | Mbam0972 | M abscessus subsp massiliense | 130         | GCA_002801855 | sputum                    | negative | negative | negative | negative | Positive | Positive |
| #N/A | 1351 | Mbam0973 | M abscessus subsp massiliense | 130         | GCA_900139525 | Respiratory system        | negative | negative | negative | negative | Positive | Positive |
| #N/A | 1344 | Mbam0975 | M abscessus subsp massiliense | 139         | GCA_900139605 | Respiratory system        | negative | negative | negative | negative | Positive | Positive |
| #N/A | 1098 | Mbam0976 | M abscessus subsp massiliense | 145         | GCA_900130275 | Respiratory system        | negative | negative | negative | negative | Positive | Positive |
| #N/A | 1493 | Mbam0977 | M abscessus subsp massiliense | 147         | GCA_900130305 | Respiratory system        | negative | negative | negative | negative | Positive | Positive |
| #N/A | 1096 | Mbam0978 | M abscessus subsp massiliense | 149         | GCA_900130325 | Respiratory system        | negative | negative | negative | negative | Positive | Positive |
| #N/A | 1494 | Mbam0979 | M abscessus subsp massiliense | 150         | GCA_900130335 | Respiratory system        | negative | negative | negative | negative | Positive | Positive |
| #N/A | 1495 | Mbam0980 | M abscessus subsp massiliense | 151         | GCA_900130345 | Respiratory system        | negative | negative | negative | negative | Positive | Positive |
| #N/A | 1496 | Mbam0983 | M abscessus subsp massiliense | 154         | GCA_900130365 | Respiratory system        | negative | negative | negative | negative | Positive | Positive |
| #N/A | 1497 | Mbam0984 | M abscessus subsp massiliense | 155         | GCA_900130375 | Respiratory system        | negative | negative | negative | negative | Positive | Positive |
| #N/A | 1498 | Mbam0985 | M abscessus subsp massiliense | 156         | GCA_900139655 | Respiratory system        | negative | negative | negative | negative | Positive | Positive |
| #N/A | 1499 | Mbam0986 | M abscessus subsp massiliense | 158         | GCA_900130385 | Respiratory system        | negative | negative | negative | negative | Positive | Positive |
| #N/A | 1174 | Mbam0987 | M abscessus subsp massiliense | 164         | GCA_900130435 | Respiratory system        | negative | negative | negative | negative | Positive | Positive |
| #N/A | 1097 | Mbam0988 | M abscessus subsp massiliense | 168         | GCA_900130285 | Respiratory system        | negative | negative | negative | negative | Positive | Positive |
| #N/A | 1099 | Mbam0989 | M abscessus subsp massiliense | 169         | GCA_900130465 | Respiratory system        | negative | negative | negative | negative | Positive | Positive |
| #N/A | 1151 | Mbam0990 | M abscessus subsp massiliense | 177         | GCA_900130535 | Respiratory system        | negative | negative | negative | negative | Positive | Positive |
| #N/A | 1152 | Mbam0991 | M abscessus subsp massiliense | 178         | GCA_900130665 | Respiratory system        | negative | negative | negative | negative | Positive | Positive |
| #N/A | 1153 | Mbam0992 | M abscessus subsp massiliense | 179         | GCA_900130675 | Respiratory system        | negative | negative | negative | negative | Positive | Positive |
| #N/A | 1209 | Mbam0993 | M abscessus subsp massiliense | 182         | GCA_900130575 | Respiratory system        | negative | negative | negative | negative | Positive | Positive |
| #N/A | 1201 | Mbam0994 | M abscessus subsp massiliense | 183         | GCA_002800135 | sputum                    | negative | negative | negative | negative | Positive | Positive |
| #N/A | 1142 | Mbam0995 | M abscessus subsp massiliense | 184         | GCA_900130585 | Respiratory system        | negative | negative | negative | negative | Positive | Positive |
| #N/A | 1105 | Mbam0997 | M abscessus subsp massiliense | 187         | GCA_900130635 | Respiratory system        | negative | negative | negative | negative | Positive | Positive |
| #N/A | 1136 | Mbam0999 | M abscessus subsp massiliense | 193         | GCA_900130755 | Respiratory system        | negative | negative | negative | negative | Positive | Positive |
| #N/A | 1203 | Mbam1001 | M abscessus subsp massiliense | 198         | GCA_900130775 | Respiratory system        | negative | negative | negative | negative | Positive | Positive |









|      |      |          |                               |                  |               |                      |          |          |          |          |          |          |
|------|------|----------|-------------------------------|------------------|---------------|----------------------|----------|----------|----------|----------|----------|----------|
| #N/A | 1048 | Mbam1245 | M abscessus subsp massiliense | 1168_3           | GCA_900138325 | Respiratory system   | negative | negative | negative | negative | Positive | Positive |
| #N/A | 1049 | Mbam1246 | M abscessus subsp massiliense | 1168_4           | GCA_900138315 | Respiratory system   | negative | negative | negative | negative | Positive | Positive |
| #N/A | 1050 | Mbam1247 | M abscessus subsp massiliense | 1168_5           | GCA_900138345 | Respiratory system   | negative | negative | negative | negative | Positive | Positive |
| #N/A | 1051 | Mbam1248 | M abscessus subsp massiliense | 1168_6           | GCA_900138335 | Respiratory system   | negative | negative | negative | negative | Positive | Positive |
| #N/A | 1052 | Mbam1249 | M abscessus subsp massiliense | 1168_7           | GCA_900138355 | Respiratory system   | negative | negative | negative | negative | Positive | Positive |
| #N/A | 1064 | Mbam1250 | M abscessus subsp massiliense | 1168_8           | GCA_900138385 | Respiratory system   | negative | negative | negative | negative | Positive | Positive |
| #N/A | 1053 | Mbam1251 | M abscessus subsp massiliense | 1168_9           | GCA_900138365 | Respiratory system   | negative | negative | negative | negative | Positive | Positive |
| #N/A | 1272 | Mbam1252 | M abscessus subsp massiliense | 3275STDY5961976  | GCA_900169205 | skin and soft tissue | negative | negative | negative | negative | Positive | Positive |
| #N/A | 1345 | Mbam1254 | M abscessus subsp massiliense | A173             | GCA_002799965 | lavage fluid         | negative | negative | negative | negative | Positive | Positive |
| #N/A | 1346 | Mbam1255 | M abscessus subsp massiliense | A174             | GCA_002801795 | sputum               | negative | negative | negative | negative | Positive | Positive |
| #N/A | 1255 | Mbam1256 | M abscessus subsp massiliense | A186             | GCA_002799945 | sputum               | negative | negative | negative | negative | Positive | Positive |
| #N/A | 1536 | Mbam1257 | M abscessus subsp massiliense | a205             | GCA_002799915 | sputum               | negative | negative | negative | negative | Positive | Positive |
| #N/A | 1356 | Mbam1258 | M abscessus subsp massiliense | A222             | GCA_002799905 | sputum               | negative | negative | negative | negative | Positive | Positive |
| #N/A | 1378 | Mbam1261 | M abscessus subsp massiliense | A254             | GCA_002801785 | sputum               | Positive | negative | negative | negative | Positive | Positive |
| #N/A | 1312 | Mbam1262 | M abscessus subsp massiliense | A267             | GCA_002799845 | lavage fluid         | negative | negative | negative | negative | Positive | Positive |
| #N/A | 1524 | Mbam1263 | M abscessus subsp massiliense | A268             | GCA_002801725 | sputum               | negative | negative | negative | negative | Positive | Positive |
| #N/A | 1294 | Mbam1266 | M abscessus subsp massiliense | A323             | GCA_002799805 | sputum               | negative | negative | negative | negative | Positive | Positive |
| #N/A | 1295 | Mbam1267 | M abscessus subsp massiliense | A365             | GCA_002799765 | sputum               | negative | negative | negative | negative | Positive | Positive |
| #N/A | 1353 | Mbam1268 | M abscessus subsp massiliense | A39              | GCA_002799695 | sputum               | negative | negative | negative | negative | Positive | Positive |
| #N/A | 1349 | Mbam1269 | M abscessus subsp massiliense | A399             | GCA_002799685 | sputum               | negative | negative | negative | negative | Positive | Positive |
| #N/A | 1347 | Mbam1270 | M abscessus subsp massiliense | A425             | GCA_002799725 | sputum               | negative | negative | negative | negative | Positive | Positive |
| #N/A | 1299 | Mbam1271 | M abscessus subsp massiliense | A428             | GCA_002799655 | sputum               | negative | negative | negative | negative | Positive | Positive |
| #N/A | 1206 | Mbam1273 | M abscessus subsp massiliense | A484             | GCA_002799715 | sputum               | negative | negative | negative | negative | Positive | Positive |
| #N/A | 1528 | Mbam1275 | M abscessus subsp massiliense | A70              | GCA_002799625 | sputum               | negative | negative | negative | negative | Positive | Positive |
| #N/A | 1387 | Mbam1276 | M abscessus subsp massiliense | aerosol_1        | GCA_900138515 | Respiratory system   | negative | negative | negative | negative | Positive | Positive |
| #N/A | 1388 | Mbam1277 | M abscessus subsp massiliense | aerosol_10       | GCA_900138705 | Respiratory system   | negative | negative | negative | negative | Positive | Positive |
| #N/A | 1389 | Mbam1278 | M abscessus subsp massiliense | aerosol_11       | GCA_900138715 | Respiratory system   | negative | negative | negative | negative | Positive | Positive |
| #N/A | 1405 | Mbam1279 | M abscessus subsp massiliense | aerosol_13       | GCA_900138545 | Respiratory system   | negative | negative | negative | negative | Positive | Positive |
| #N/A | 1406 | Mbam1280 | M abscessus subsp massiliense | aerosol_14       | GCA_900138555 | Respiratory system   | negative | negative | negative | negative | Positive | Positive |
| #N/A | 1390 | Mbam1281 | M abscessus subsp massiliense | aerosol_15       | GCA_900138575 | Respiratory system   | negative | negative | negative | negative | Positive | Positive |
| #N/A | 1391 | Mbam1282 | M abscessus subsp massiliense | aerosol_17       | GCA_900138595 | Respiratory system   | negative | negative | negative | negative | Positive | Positive |
| #N/A | 1404 | Mbam1283 | M abscessus subsp massiliense | aerosol_18       | GCA_900138615 | Respiratory system   | negative | negative | negative | negative | Positive | Positive |
| #N/A | 1407 | Mbam1284 | M abscessus subsp massiliense | aerosol_19       | GCA_900138585 | Respiratory system   | negative | negative | negative | negative | Positive | Positive |
| #N/A | 1392 | Mbam1285 | M abscessus subsp massiliense | aerosol_24       | GCA_900138655 | Respiratory system   | negative | negative | negative | negative | Positive | Positive |
| #N/A | 1393 | Mbam1286 | M abscessus subsp massiliense | aerosol_25       | GCA_900138625 | Respiratory system   | negative | negative | negative | negative | Positive | Positive |
| #N/A | 1394 | Mbam1287 | M abscessus subsp massiliense | aerosol_26       | GCA_900138645 | Respiratory system   | negative | negative | negative | negative | Positive | Positive |
| #N/A | 1395 | Mbam1288 | M abscessus subsp massiliense | aerosol_4        | GCA_900138675 | Respiratory system   | negative | negative | negative | negative | Positive | Positive |
| #N/A | 1396 | Mbam1289 | M abscessus subsp massiliense | aerosol_5        | GCA_900138665 | Respiratory system   | negative | negative | negative | negative | Positive | Positive |
| #N/A | 1397 | Mbam1290 | M abscessus subsp massiliense | aerosol_6        | GCA_900138685 | Respiratory system   | negative | negative | negative | negative | Positive | Positive |
| #N/A | 1398 | Mbam1291 | M abscessus subsp massiliense | aerosol_7        | GCA_900138695 | Respiratory system   | negative | negative | negative | negative | Positive | Positive |
| #N/A | 1399 | Mbam1292 | M abscessus subsp massiliense | aerosol_9        | GCA_900138725 | Respiratory system   | negative | negative | negative | negative | Positive | Positive |
| #N/A | 1400 | Mbam1293 | M abscessus subsp massiliense | aerosol_Bronch_1 | GCA_900136405 | Respiratory system   | negative | negative | negative | negative | Positive | Positive |
| #N/A | 1401 | Mbam1294 | M abscessus subsp massiliense | aerosol_Bronch_2 | GCA_900136425 | Respiratory system   | negative | negative | negative | negative | Positive | Positive |
| #N/A | 1402 | Mbam1295 | M abscessus subsp massiliense | aerosol_Sputum_1 | GCA_900138525 | Respiratory system   | negative | negative | negative | negative | Positive | Positive |
| #N/A | 1403 | Mbam1296 | M abscessus subsp massiliense | aerosol_Sputum_2 | GCA_900138635 | Respiratory system   | negative | negative | negative | negative | Positive | Positive |
| #N/A | 1054 | Mbam1304 | M abscessus subsp massiliense | Room_15_sink     | GCA_900138535 | Respiratory system   | negative | negative | negative | negative | Positive | Positive |
| #N/A | 1469 | Mbam1306 | M abscessus                   | 23               | GCA_001792635 | respiratory          | negative | negative | negative | negative | Positive | Positive |
| #N/A | 1541 | Mbam1307 | M abscessus                   | 175              | GCA_003072265 | sputum               | negative | negative | negative | negative | negative | negative |
| #N/A | 1184 | Mbam1320 | M abscessus                   | 47J26            | GCA_000231155 | sputum               | negative | negative | negative | negative | Positive | Positive |
| #N/A | 1508 | Mbam1329 | M abscessus                   | 5S-0422          | GCA_000271065 | sputum               | negative | negative | negative | negative | negative | negative |
| #N/A | 1509 | Mbam1330 | M abscessus                   | 5S-0708          | GCA_000271085 | sputum               | negative | negative | negative | negative | negative | negative |
| #N/A | 1510 | Mbam1331 | M abscessus                   | 5S-0817          | GCA_000271005 | lung autopsy         | negative | negative | negative | negative | negative | negative |
| #N/A | 1515 | Mbam1332 | M abscessus                   | 5S-0921          | GCA_000270965 | lymphnode biopsy     | negative | negative | negative | negative | negative | negative |

|      |      |          |             |                 |               |                        |          |          |          |          |          |          |
|------|------|----------|-------------|-----------------|---------------|------------------------|----------|----------|----------|----------|----------|----------|
| #N/A | 1511 | Mbam1334 | M abscessus | 5S-1215         | GCA_000271045 | sputum                 | negative | negative | negative | negative | negative | negative |
| #N/A | 1085 | Mbam1357 | M abscessus | FLAC008         | GCA_001606275 | Homo sapiens           | negative | negative | negative | negative | Positive | Positive |
| #N/A | 1456 | Mbam1358 | M abscessus | FLAC012         | GCA_002142915 | Homo sapiens           | negative | negative | negative | negative | Positive | Positive |
| #N/A | 1444 | Mbam1366 | M abscessus | FLAC040         | GCA_002142855 | Homo sapiens           | negative | negative | negative | negative | Positive | Positive |
| #N/A | 1451 | Mbam1371 | M abscessus | FLAC050         | GCA_002142835 | Homo sapiens           | negative | negative | negative | negative | Positive | Positive |
| #N/A | 1452 | Mbam1372 | M abscessus | FLAC051         | GCA_002142785 | Homo sapiens           | negative | negative | negative | negative | Positive | Positive |
| #N/A | 1461 | Mbam1373 | M abscessus | FLAC052         | GCA_002142755 | Homo sapiens           | negative | negative | negative | negative | Positive | Positive |
| #N/A | 1506 | Mbam1375 | M abscessus | FLAC054         | GCA_001610675 | Homo sapiens           | negative | negative | negative | negative | Positive | Positive |
| #N/A | 1445 | Mbam1377 | M abscessus | FLAC078         | GCA_002142765 | Homo sapiens           | negative | negative | negative | negative | Positive | Positive |
| #N/A | 1525 | Mbam1380 | M abscessus | G105            | GCA_003583035 | sputum                 | negative | negative | negative | negative | Positive | Positive |
| #N/A | 1212 | Mbam1382 | M abscessus | G107            | GCA_003583005 | Bronchoalveolar lavage | negative | negative | negative | negative | Positive | Positive |
| #N/A | 1308 | Mbam1391 | M abscessus | G116            | GCA_003582855 | sputum                 | negative | negative | negative | negative | Positive | Positive |
| #N/A | 1367 | Mbam1399 | M abscessus | G126            | GCA_003582745 | Bronchoalveolar lavage | negative | negative | negative | negative | Positive | Positive |
| #N/A | 1409 | Mbam1404 | M abscessus | G135            | GCA_003582655 | sputum                 | negative | negative | negative | negative | Positive | Positive |
| #N/A | 1542 | Mbam1405 | M abscessus | G137            | GCA_003582645 | sputum                 | negative | negative | negative | negative | Positive | Positive |
| #N/A | 1167 | Mbam1408 | M abscessus | G141            | GCA_003076855 | sputum                 | negative | negative | negative | negative | Positive | Positive |
| #N/A | 1237 | Mbam1412 | M abscessus | G147            | GCA_003072155 | sputum                 | negative | negative | negative | negative | Positive | Positive |
| #N/A | 1197 | Mbam1416 | M abscessus | G153            | GCA_003076875 | sputum                 | negative | negative | negative | negative | Positive | Positive |
| #N/A | 1296 | Mbam1418 | M abscessus | G157            | GCA_003582475 | Bronchoalveolar lavage | negative | negative | negative | negative | Positive | Positive |
| #N/A | 1412 | Mbam1427 | M abscessus | G173            | GCA_003582375 | sputum                 | negative | negative | negative | negative | Positive | Positive |
| #N/A | 1306 | Mbam1438 | M abscessus | G188            | GCA_003582175 | sputum                 | negative | negative | negative | negative | Positive | Positive |
| #N/A | 1307 | Mbam1439 | M abscessus | G190            | GCA_003582165 | sputum                 | negative | negative | negative | negative | Positive | Positive |
| #N/A | 1532 | Mbam1448 | M abscessus | G203            | GCA_003071905 | sputum                 | negative | negative | negative | negative | Positive | Positive |
| #N/A | 1543 | Mbam1451 | M abscessus | G207            | GCA_003072295 | sputum                 | negative | negative | negative | negative | Positive | Positive |
| #N/A | 1204 | Mbam1458 | M abscessus | G220            | GCA_003076795 | sputum                 | negative | negative | negative | negative | Positive | Positive |
| #N/A | 1348 | Mbam1462 | M abscessus | G75             | GCA_003581825 | sputum                 | negative | negative | negative | negative | Positive | Positive |
| #N/A | 1300 | Mbam1464 | M abscessus | G77             | GCA_003072165 | sputum                 | negative | negative | negative | negative | Positive | Positive |
| #N/A | 1205 | Mbam1469 | M abscessus | G88             | GCA_003072345 | Bronchoalveolar lavage | negative | negative | negative | negative | Positive | Positive |
| #N/A | 1089 | Mbam1474 | M abscessus | G95             | GCA_003580145 | sputum                 | negative | negative | negative | negative | Positive | Positive |
| #N/A | 1371 | Mbam1481 | M abscessus | M148            | GCA_000280655 | sputum                 | negative | negative | negative | negative | Positive | Positive |
| #N/A | 1194 | Mbam1493 | M abscessus | MAB_082312_2272 | GCA_000523735 | Homo sapiens           | negative | negative | negative | negative | Positive | Positive |
| #N/A | 1279 | Mbam1494 | M abscessus | MAB_091912_2446 | GCA_000500185 | sputum                 | negative | negative | negative | negative | Positive | Positive |
| #N/A | 1236 | Mbam1504 | M abscessus | PAP006          | GCA_001213185 | sputum                 | negative | negative | negative | negative | Positive | Positive |
| #N/A | 1232 | Mbam1505 | M abscessus | PAP007          | GCA_001214025 | sputum                 | negative | negative | negative | negative | Positive | Positive |
| #N/A | 1219 | Mbam1507 | M abscessus | PAP009          | GCA_001213065 | sputum                 | negative | negative | negative | negative | Positive | Positive |
| #N/A | 1233 | Mbam1514 | M abscessus | PAP016          | GCA_001213545 | sputum                 | negative | negative | negative | negative | Positive | Positive |
| #N/A | 1220 | Mbam1515 | M abscessus | PAP017          | GCA_001213125 | sputum                 | negative | negative | negative | negative | Positive | Positive |
| #N/A | 1262 | Mbam1516 | M abscessus | PAP018          | GCA_001212825 | sputum                 | negative | negative | negative | negative | Positive | Positive |
| #N/A | 1065 | Mbam1520 | M abscessus | PAP023          | GCA_001212965 | sputum                 | negative | negative | negative | negative | Positive | Positive |
| #N/A | 1230 | Mbam1521 | M abscessus | PAP024          | GCA_001213325 | sputum                 | negative | negative | negative | negative | Positive | Positive |
| #N/A | 1221 | Mbam1522 | M abscessus | PAP025          | GCA_001213805 | sputum                 | negative | negative | negative | negative | Positive | Positive |
| #N/A | 1228 | Mbam1523 | M abscessus | PAP026          | GCA_001214125 | sputum                 | negative | negative | negative | negative | Positive | Positive |
| #N/A | 1222 | Mbam1524 | M abscessus | PAP027          | GCA_001213245 | sputum                 | negative | negative | negative | negative | Positive | Positive |
| #N/A | 1259 | Mbam1525 | M abscessus | PAP028          | GCA_001213905 | sputum                 | negative | negative | negative | negative | Positive | Positive |
| #N/A | 1234 | Mbam1528 | M abscessus | PAP031          | GCA_001213765 | sputum                 | negative | negative | negative | negative | Positive | Positive |
| #N/A | 1223 | Mbam1531 | M abscessus | PAP034          | GCA_001213145 | sputum                 | negative | negative | negative | negative | Positive | Positive |
| #N/A | 1229 | Mbam1533 | M abscessus | PAP037          | GCA_001213585 | sputum                 | negative | negative | negative | negative | Positive | Positive |
| #N/A | 1074 | Mbam1535 | M abscessus | PAP039          | GCA_001213405 | sputum                 | negative | negative | negative | negative | Positive | Positive |
| #N/A | 1382 | Mbam1539 | M abscessus | PAP043          | GCA_001213025 | sputum                 | negative | negative | negative | negative | Positive | Positive |
| #N/A | 1231 | Mbam1541 | M abscessus | PAP045          | GCA_001213865 | sputum                 | negative | negative | negative | negative | Positive | Positive |
| #N/A | 1079 | Mbam1544 | M abscessus | PAP048          | GCA_001213625 | sputum                 | negative | negative | negative | negative | Positive | Positive |
| #N/A | 1129 | Mbam1545 | M abscessus | PAP049          | GCA_001214165 | sputum                 | negative | negative | negative | negative | Positive | Positive |
| #N/A | 1269 | Mbam1546 | M abscessus | PAP050          | GCA_001213465 | sputum                 | negative | negative | negative | negative | Positive | Positive |



|      |      |          |             |        |               |        |          |          |          |          |          |          |
|------|------|----------|-------------|--------|---------------|--------|----------|----------|----------|----------|----------|----------|
| #N/A | 1260 | Mbam1547 | M abscessus | PAP051 | GCA_001214565 | sputum | negative | negative | negative | negative | Positive | Positive |
| #N/A | 1264 | Mbam1548 | M abscessus | PAP052 | GCA_001214205 | sputum | negative | negative | negative | negative | Positive | Positive |
| #N/A | 1120 | Mbam1550 | M abscessus | PAP055 | GCA_001215245 | sputum | negative | negative | negative | negative | Positive | Positive |
| #N/A | 1113 | Mbam1551 | M abscessus | PAP057 | GCA_001215485 | sputum | negative | negative | negative | negative | Positive | Positive |
| #N/A | 1112 | Mbam1552 | M abscessus | PAP058 | GCA_001213425 | sputum | negative | negative | negative | negative | Positive | Positive |
| #N/A | 1066 | Mbam1553 | M abscessus | PAP059 | GCA_001214005 | sputum | negative | negative | negative | negative | Positive | Positive |
| #N/A | 1384 | Mbam1562 | M abscessus | PAP070 | GCA_001214145 | sputum | negative | negative | negative | negative | Positive | Positive |
| #N/A | 1075 | Mbam1564 | M abscessus | PAP072 | GCA_001214645 | sputum | negative | negative | negative | negative | Positive | Positive |
| #N/A | 1055 | Mbam1565 | M abscessus | PAP073 | GCA_001216825 | sputum | negative | negative | negative | negative | Positive | Positive |
| #N/A | 1078 | Mbam1566 | M abscessus | PAP074 | GCA_001217165 | sputum | negative | negative | negative | negative | Positive | Positive |
| #N/A | 1076 | Mbam1570 | M abscessus | PAP078 | GCA_001214725 | sputum | negative | negative | negative | negative | Positive | Positive |
| #N/A | 1071 | Mbam1572 | M abscessus | PAP080 | GCA_001215325 | sputum | negative | negative | negative | negative | Positive | Positive |
| #N/A | 1077 | Mbam1573 | M abscessus | PAP081 | GCA_001217225 | sputum | negative | negative | negative | negative | Positive | Positive |
| #N/A | 1063 | Mbam1576 | M abscessus | PAP084 | GCA_001214465 | sputum | negative | negative | negative | negative | Positive | Positive |
| #N/A | 1067 | Mbam1578 | M abscessus | PAP086 | GCA_001215645 | sputum | negative | negative | negative | negative | Positive | Positive |
| #N/A | 1070 | Mbam1579 | M abscessus | PAP087 | GCA_001216005 | sputum | negative | negative | negative | negative | Positive | Positive |
| #N/A | 1370 | Mbam1580 | M abscessus | PAP088 | GCA_001216925 | sputum | negative | negative | negative | negative | Positive | Positive |
| #N/A | 1224 | Mbam1581 | M abscessus | PAP089 | GCA_001215065 | sputum | negative | negative | negative | negative | Positive | Positive |
| #N/A | 1123 | Mbam1583 | M abscessus | PAP091 | GCA_001214285 | sputum | negative | negative | negative | negative | Positive | Positive |
| #N/A | 1056 | Mbam1584 | M abscessus | PAP092 | GCA_001214305 | sputum | negative | negative | negative | negative | Positive | Positive |
| #N/A | 1227 | Mbam1585 | M abscessus | PAP093 | GCA_001214405 | sputum | negative | negative | negative | negative | Positive | Positive |
| #N/A | 1086 | Mbam1586 | M abscessus | PAP094 | GCA_001214885 | sputum | negative | negative | negative | negative | Positive | Positive |
| #N/A | 1131 | Mbam1587 | M abscessus | PAP095 | GCA_001213365 | sputum | negative | negative | negative | negative | Positive | Positive |
| #N/A | 1057 | Mbam1588 | M abscessus | PAP096 | GCA_001215905 | sputum | negative | negative | negative | negative | Positive | Positive |
| #N/A | 1263 | Mbam1589 | M abscessus | PAP097 | GCA_001212945 | sputum | negative | negative | negative | negative | Positive | Positive |
| #N/A | 1225 | Mbam1590 | M abscessus | PAP098 | GCA_001217365 | sputum | negative | negative | negative | negative | Positive | Positive |
| #N/A | 1130 | Mbam1592 | M abscessus | PAP100 | GCA_001215345 | sputum | negative | negative | negative | negative | Positive | Positive |
| #N/A | 1266 | Mbam1593 | M abscessus | PAP101 | GCA_001216185 | sputum | negative | negative | negative | negative | Positive | Positive |
| #N/A | 1126 | Mbam1595 | M abscessus | PAP103 | GCA_001216225 | sputum | negative | negative | negative | negative | Positive | Positive |
| #N/A | 1155 | Mbam1596 | M abscessus | PAP104 | GCA_001216625 | sputum | negative | negative | negative | negative | Positive | Positive |
| #N/A | 1132 | Mbam1597 | M abscessus | PAP105 | GCA_001217405 | sputum | negative | negative | negative | negative | Positive | Positive |
| #N/A | 1116 | Mbam1599 | M abscessus | PAP107 | GCA_001216665 | sputum | negative | negative | negative | negative | Positive | Positive |
| #N/A | 1058 | Mbam1600 | M abscessus | PAP108 | GCA_001216365 | sputum | negative | negative | negative | negative | Positive | Positive |
| #N/A | 1117 | Mbam1601 | M abscessus | PAP109 | GCA_001215285 | sputum | negative | negative | negative | negative | Positive | Positive |
| #N/A | 1267 | Mbam1602 | M abscessus | PAP110 | GCA_001214445 | sputum | negative | negative | negative | negative | Positive | Positive |
| #N/A | 1122 | Mbam1603 | M abscessus | PAP111 | GCA_001216405 | sputum | negative | negative | negative | negative | Positive | Positive |
| #N/A | 1135 | Mbam1604 | M abscessus | PAP112 | GCA_001216865 | sputum | negative | negative | negative | negative | Positive | Positive |
| #N/A | 1134 | Mbam1606 | M abscessus | PAP114 | GCA_001217285 | sputum | negative | negative | negative | negative | Positive | Positive |
| #N/A | 1115 | Mbam1608 | M abscessus | PAP116 | GCA_001214525 | sputum | negative | negative | negative | negative | Positive | Positive |
| #N/A | 1491 | Mbam1609 | M abscessus | PAP117 | GCA_001216165 | sputum | negative | negative | negative | negative | Positive | Positive |
| #N/A | 1121 | Mbam1610 | M abscessus | PAP118 | GCA_001216725 | sputum | negative | negative | negative | negative | Positive | Positive |
| #N/A | 1119 | Mbam1611 | M abscessus | PAP119 | GCA_001214825 | sputum | negative | negative | negative | negative | Positive | Positive |
| #N/A | 1226 | Mbam1612 | M abscessus | PAP120 | GCA_001216905 | sputum | negative | negative | negative | negative | Positive | Positive |
| #N/A | 1265 | Mbam1613 | M abscessus | PAP121 | GCA_001216885 | sputum | negative | negative | negative | negative | Positive | Positive |
| #N/A | 1268 | Mbam1614 | M abscessus | PAP122 | GCA_001214665 | sputum | negative | negative | negative | negative | Positive | Positive |
| #N/A | 1059 | Mbam1615 | M abscessus | PAP123 | GCA_001215025 | sputum | negative | negative | negative | negative | Positive | Positive |
| #N/A | 1118 | Mbam1616 | M abscessus | PAP124 | GCA_001214505 | sputum | negative | negative | negative | negative | Positive | Positive |
| #N/A | 1111 | Mbam1617 | M abscessus | PAP125 | GCA_001214265 | sputum | negative | negative | negative | negative | Positive | Positive |
| #N/A | 1114 | Mbam1618 | M abscessus | PAP126 | GCA_001215305 | sputum | negative | negative | negative | negative | Positive | Positive |
| #N/A | 1125 | Mbam1620 | M abscessus | PAP128 | GCA_001214845 | sputum | negative | negative | negative | negative | Positive | Positive |
| #N/A | 1258 | Mbam1621 | M abscessus | PAP129 | GCA_001217325 | sputum | negative | negative | negative | negative | Positive | Positive |
| #N/A | 1261 | Mbam1626 | M abscessus | PAP134 | GCA_001217465 | sputum | negative | negative | negative | negative | Positive | Positive |
| #N/A | 1235 | Mbam1627 | M abscessus | PAP135 | GCA_001215205 | sputum | negative | negative | negative | negative | Positive | Positive |

Akwani et al., Supplementary Table.

|      |      |          |             |            |               |                            |          |          |          |          |          |          |
|------|------|----------|-------------|------------|---------------|----------------------------|----------|----------|----------|----------|----------|----------|
| #N/A | 1060 | Mbam1628 | M abscessus | PAP136     | GCA_001216805 | sputum                     | negative | negative | negative | negative | Positive | Positive |
| #N/A | 1061 | Mbam1629 | M abscessus | PAP137     | GCA_001216045 | sputum                     | negative | negative | negative | negative | Positive | Positive |
| #N/A | 1080 | Mbam1633 | M abscessus | PAP141     | GCA_001214685 | sputum                     | negative | negative | negative | negative | Positive | Positive |
| #N/A | 1073 | Mbam1635 | M abscessus | PAP143     | GCA_001214345 | sputum                     | negative | negative | negative | negative | Positive | Positive |
| #N/A | 1068 | Mbam1636 | M abscessus | PAP144     | GCA_001217105 | sputum                     | negative | negative | negative | negative | Positive | Positive |
| #N/A | 1062 | Mbam1637 | M abscessus | PAP145     | GCA_001214805 | sputum                     | negative | negative | negative | negative | Positive | Positive |
| #N/A | 1276 | Mbam1638 | M abscessus | PAP146     | GCA_001215605 | sputum                     | negative | negative | negative | negative | Positive | Positive |
| #N/A | 1156 | Mbam1639 | M abscessus | PAP147     | GCA_001217485 | sputum                     | negative | negative | negative | negative | Positive | Positive |
| #N/A | 1275 | Mbam1640 | M abscessus | PAP148     | GCA_001216245 | sputum                     | negative | negative | negative | negative | Positive | Positive |
| #N/A | 1278 | Mbam1641 | M abscessus | PAP149     | GCA_001214945 | sputum                     | negative | negative | negative | negative | Positive | Positive |
| #N/A | 1133 | Mbam1642 | M abscessus | PAP150     | GCA_001215225 | sputum                     | negative | negative | negative | negative | Positive | Positive |
| #N/A | 1286 | Mbam1643 | M abscessus | PAP151     | GCA_001214905 | sputum                     | negative | negative | negative | negative | Positive | Positive |
| #N/A | 1287 | Mbam1644 | M abscessus | PAP152     | GCA_001216105 | sputum                     | negative | negative | negative | negative | Positive | Positive |
| #N/A | 1282 | Mbam1645 | M abscessus | PAP154     | GCA_001215705 | sputum                     | negative | negative | negative | negative | Positive | Positive |
| #N/A | 1283 | Mbam1646 | M abscessus | PAP155     | GCA_001217005 | sputum                     | negative | negative | negative | negative | Positive | Positive |
| #N/A | 1289 | Mbam1647 | M abscessus | PAP156     | GCA_001215125 | sputum                     | negative | negative | negative | negative | Positive | Positive |
| #N/A | 1280 | Mbam1648 | M abscessus | PAP157     | GCA_001215745 | sputum                     | negative | negative | negative | negative | Positive | Positive |
| #N/A | 1492 | Mbam1649 | M abscessus | PAP158     | GCA_001217065 | sputum                     | negative | negative | negative | negative | Positive | Positive |
| #N/A | 1124 | Mbam1650 | M abscessus | PAP159     | GCA_001216685 | sputum                     | negative | negative | negative | negative | Positive | Positive |
| #N/A | 1277 | Mbam1654 | M abscessus | PAP164     | GCA_001216525 | sputum                     | negative | negative | negative | negative | Positive | Positive |
| #N/A | 1284 | Mbam1655 | M abscessus | PAP167     | GCA_001216325 | sputum                     | negative | negative | negative | negative | Positive | Positive |
| #N/A | 1285 | Mbam1656 | M abscessus | PAP168     | GCA_001214385 | sputum                     | negative | negative | negative | negative | Positive | Positive |
| #N/A | 1290 | Mbam1657 | M abscessus | PAP169     | GCA_001215825 | sputum                     | negative | negative | negative | negative | Positive | Positive |
| #N/A | 1281 | Mbam1659 | M abscessus | PAP171     | GCA_001214605 | sputum                     | negative | negative | negative | negative | Positive | Positive |
| #N/A | #N/A | Mche1664 | M chelonae  | 203        | GCA_001853695 | python                     | negative | negative | negative | negative | negative | negative |
| #N/A | #N/A | Mche1665 | M chelonae  | 1557       | GCA_001853585 | Not available              | negative | negative | negative | negative | negative | negative |
| #N/A | #N/A | Mche1666 | M chelonae  | 1558       | GCA_001853805 | sputum                     | negative | negative | negative | negative | negative | negative |
| #N/A | #N/A | Mche1667 | M chelonae  | 15510      | GCA_001853845 | soft tissue (calf)         | negative | negative | negative | negative | negative | negative |
| #N/A | #N/A | Mche1668 | M chelonae  | 15511      | GCA_001853865 | soft tissue (foot)         | negative | negative | negative | negative | negative | negative |
| #N/A | #N/A | Mche1669 | M chelonae  | 15512      | GCA_001853925 | sputum                     | negative | negative | negative | negative | negative | negative |
| #N/A | #N/A | Mche1670 | M chelonae  | 15513      | GCA_001853885 | soft tissue (axilla)       | negative | negative | negative | negative | negative | negative |
| #N/A | #N/A | Mche1671 | M chelonae  | 15514      | GCA_001853965 | eye                        | negative | negative | negative | negative | negative | negative |
| #N/A | #N/A | Mche1672 | M chelonae  | 15515      | GCA_001853945 | knee (synovial fluid)      | negative | negative | negative | negative | negative | negative |
| #N/A | #N/A | Mche1673 | M chelonae  | 15517      | GCA_001853985 | soft tissue (finger)       | negative | negative | negative | negative | negative | negative |
| #N/A | #N/A | Mche1674 | M chelonae  | 15519      | GCA_001853895 | soft tissue (skin)         | negative | negative | negative | negative | negative | negative |
| #N/A | #N/A | Mche1675 | M chelonae  | 15520      | GCA_001854015 | soft tissue (leg)          | negative | negative | negative | negative | negative | negative |
| #N/A | #N/A | Mche1676 | M chelonae  | 24998      | GCA_001853535 | seahorse, ovary            | negative | negative | negative | negative | negative | negative |
| #N/A | #N/A | Mche1677 | M chelonae  | 29191      | GCA_001853745 | seadragon, soft tissue     | negative | negative | negative | negative | negative | negative |
| #N/A | #N/A | Mche1678 | M chelonae  | 29192      | GCA_001853715 | seadragon, liver mesentery | negative | negative | negative | negative | negative | negative |
| #N/A | #N/A | Mche1679 | M chelonae  | 35599      | GCA_001853605 | seahorse, tail             | negative | negative | negative | negative | negative | negative |
| #N/A | #N/A | Mche1680 | M chelonae  | 35600      | GCA_001853615 | seahorse, ovary            | negative | negative | negative | negative | negative | negative |
| #N/A | #N/A | Mche1681 | M chelonae  | 37256      | GCA_001942575 | Cichlid, spleen            | negative | negative | negative | negative | negative | negative |
| #N/A | #N/A | Mche1682 | M chelonae  | 42895      | GCA_001853545 | seahorse, skeletal muscle  | negative | negative | negative | negative | negative | negative |
| #N/A | #N/A | Mche1683 | M chelonae  | 96-1705    | GCA_002013595 | Foot biopsy                | negative | negative | negative | negative | negative | negative |
| #N/A | #N/A | Mche1684 | M chelonae  | 96-1717    | GCA_002013725 | Tissue from hand           | negative | negative | negative | negative | negative | negative |
| #N/A | #N/A | Mche1685 | M chelonae  | 96-1720    | GCA_002013305 | Leg abscess                | negative | negative | negative | negative | negative | negative |
| #N/A | #N/A | Mche1686 | M chelonae  | 96-1724    | GCA_002013635 | Leg abscess                | negative | negative | negative | negative | negative | negative |
| #N/A | #N/A | Mche1687 | M chelonae  | 96-1728    | GCA_002013315 | liver tissue               | negative | negative | negative | negative | negative | negative |
| #N/A | #N/A | Mche1688 | M chelonae  | ATCC-19237 | GCA_001942555 | gastric lavage             | negative | negative | negative | negative | negative | negative |
| #N/A | #N/A | Mche1689 | M chelonae  | ATCC-35752 | GCA_000971805 | Not available              | negative | negative | negative | negative | negative | negative |
| #N/A | #N/A | Mche1690 | M chelonae  | B17_S14    | GCA_001853775 | aquarium                   | negative | negative | negative | negative | negative | negative |
| #N/A | #N/A | Mche1691 | M chelonae  | B20_S13    | GCA_001853665 | aquarium                   | negative | negative | negative | negative | negative | negative |
| #N/A | #N/A | Mche1692 | M chelonae  | B3_S15     | GCA_001853685 | Not available              | negative | negative | negative | negative | negative | negative |

|      |      |          |                 |             |               |                        |          |          |          |          |          |          |
|------|------|----------|-----------------|-------------|---------------|------------------------|----------|----------|----------|----------|----------|----------|
| #N/A | #N/A | Mche1693 | M chelonae      | CCUG-47445  | GCA_001632805 | Not available          | negative | negative | negative | negative | negative | negative |
| #N/A | #N/A | Mche1694 | M chelonae      | D16Q24      | GCA_002013815 | Tap water              | negative | negative | negative | negative | negative | negative |
| #N/A | #N/A | Mche1695 | M chelonae      | D16R10      | GCA_002013675 | surface water          | negative | negative | negative | negative | negative | negative |
| #N/A | #N/A | Mche1696 | M chelonae      | D16R14      | GCA_002013825 | Tap water              | negative | negative | negative | negative | negative | negative |
| #N/A | #N/A | Mche1697 | M chelonae      | D16R19      | GCA_002013515 | surface water          | negative | negative | negative | negative | negative | negative |
| #N/A | #N/A | Mche1698 | M chelonae      | D16R2       | GCA_002013455 | Tap water              | negative | negative | negative | negative | negative | negative |
| #N/A | #N/A | Mche1699 | M chelonae      | D16R20      | GCA_002013535 | surface water          | negative | negative | negative | negative | negative | negative |
| #N/A | #N/A | Mche1700 | M chelonae      | D16R7       | GCA_002013855 | Tap water              | negative | negative | negative | negative | negative | negative |
| #N/A | #N/A | Mche1701 | M chelonae      | D16R9       | GCA_002013485 | Tap water              | negative | negative | negative | negative | negative | negative |
| #N/A | #N/A | Mche1703 | M chelonae      | Trumpetfish | GCA_001854035 | trumpetfish            | negative | negative | negative | negative | negative | negative |
| #N/A | #N/A | Mfra1704 | M franklinii    | 1559        | GCA_001853795 | soft tissue (nasal)    | negative | negative | negative | negative | negative | negative |
| #N/A | #N/A | Mfra1705 | M franklinii    | CV002       | GCA_002013895 | skin lesion            | negative | negative | negative | negative | negative | negative |
| #N/A | #N/A | Mfra1706 | M franklinii    | D16Q19      | GCA_002013715 | Water work             | negative | negative | negative | negative | negative | negative |
| #N/A | #N/A | Mfra1707 | M franklinii    | D16R27      | GCA_002013295 | Tap water              | negative | negative | negative | negative | negative | negative |
| #N/A | #N/A | Mfra1708 | M franklinii    | DSM-45524   | GCA_002086225 | Not available          | negative | negative | negative | negative | negative | negative |
| #N/A | #N/A | Mimm1709 | M immunogenum   | ATCC-700505 | GCA_002101665 | metalworking fluids    | negative | negative | negative | negative | negative | negative |
| #N/A | #N/A | Mimm1710 | M immunogenum   | CCUG-47286  | GCA_001605725 | Not available          | negative | negative | negative | negative | negative | negative |
| #N/A | #N/A | Mimm1711 | M immunogenum   | CD11-6      | GCA_001655155 | Duodenal mucosa Celiac | negative | negative | negative | negative | negative | negative |
| #N/A | #N/A | Mimm1712 | M immunogenum   | FLAC016     | GCA_001677135 | Homo sapiens           | negative | negative | negative | negative | negative | negative |
| #N/A | #N/A | Mimm1713 | M immunogenum   | H008        | GCA_001296275 | drinking water         | negative | negative | negative | negative | negative | negative |
| #N/A | #N/A | Mimm1714 | M immunogenum   | H060        | GCA_001296265 | drinking water         | negative | negative | negative | negative | negative | negative |
| #N/A | #N/A | Mimm1715 | M immunogenum   | H068        | GCA_001296245 | drinking water         | negative | negative | negative | negative | negative | negative |
| #N/A | #N/A | Mimm1716 | M immunogenum   | H074        | GCA_001296255 | drinking water         | negative | negative | negative | negative | negative | negative |
| #N/A | #N/A | Mimm1717 | M immunogenum   | H088        | GCA_001296345 | drinking water         | negative | negative | negative | negative | negative | negative |
| #N/A | #N/A | Mimm1718 | M immunogenum   | H097        | GCA_001296415 | drinking water         | negative | negative | negative | negative | negative | negative |
| #N/A | #N/A | Mimm1719 | M immunogenum   | H106        | GCA_001296385 | drinking water         | negative | negative | negative | negative | negative | negative |
| #N/A | #N/A | Mimm1720 | M immunogenum   | H113        | GCA_001296405 | drinking water         | negative | negative | negative | negative | negative | negative |
| #N/A | #N/A | Mimm1721 | M immunogenum   | HXV         | GCA_001296335 | drinking water         | negative | negative | negative | negative | negative | negative |
| #N/A | #N/A | Mimm1722 | M immunogenum   | HXXI        | GCA_001296425 | drinking water         | negative | negative | negative | negative | negative | negative |
| #N/A | #N/A | Mimm1723 | M immunogenum   | MC-779      | GCA_002013555 | bronchoalveolar fluid  | negative | negative | negative | negative | negative | negative |
| #N/A | #N/A | Mimm1724 | M immunogenum   | SMUC14      | GCA_000878425 | brain abscess          | negative | negative | negative | negative | negative | negative |
| #N/A | #N/A | Msal1725 | M salmoniphilum | D16Q15      | GCA_002013645 | Tap water              | negative | negative | negative | negative | negative | negative |
| #N/A | #N/A | Msal1726 | M salmoniphilum | SC          | GCA_002013685 | Chinook salmon         | negative | negative | negative | negative | negative | negative |
| #N/A | #N/A | Msaol727 | M saopaulense   | 8489        | GCA_001853625 | turtle, soft tissue    | negative | negative | negative | negative | negative | negative |
| #N/A | #N/A | Msaol728 | M saopaulense   | 8528        | GCA_001853765 | cow, aquarium          | negative | negative | negative | negative | negative | negative |
| #N/A | #N/A | Msaol729 | M saopaulense   | CCUG-66554  | GCA_002086715 | Not available          | negative | Positive | negative | negative | negative | negative |

1. SNP: Order in the core genome SNP tree shown in Figure 2, from top to bottom. cgMLST: Order in the cgMLST tree shown in Figure S2, from top to bottom.
2. Assignment to MABC subspecies. Mbaa = *M. abscessus* subspecies *abscessus*, Mbab = *M. abscessus* subspecies *bolletii* and Mbam = *M. abscessus* subspecies *massiliense*.
3. Genus/species/subspecies description as used in the NCBI Genomes database.
4. Accession number to the genome assembly used in the analysis.
